# Supplementary material for: The first TDDFT and MCD studies of free base triarylcorroles: A closer look into solvent-dependent UV-visible absorption
Source: Royal Society of Chemistry journal article supplement (doi:10.1039/c2cc31146a), 2012-01-01
Supplement: c2cc31146a.pdf [file c2cc31146a.pdf]

## Supporting information for manuscript:

### **The first TDDFT and MCD studies of free base triarylcorroles: A closer look into solvent-dependent UV-visible absorption**

Christopher J. Ziegler,<sup>\*a</sup> Jared R. Sabin,<sup>b</sup> G. Richard Geier III,<sup>\*c</sup> and Victor N. Nemykin<sup>\*b</sup>

<sup>a</sup> *Department of Chemistry, University of Akron, Akron, OH 44325, USA. E-mail: ziegler@uakron.edu*

<sup>b</sup> *Department of Chemistry & Biochemistry, University of Minnesota Duluth, Duluth, MN 55812, USA. E-mail: vnemykin@d.umn.edu*

<sup>c</sup> *Department of Chemistry, Colgate University, Hamilton, NY 13346, USA. E-mail: ggeier@colgate.edu*

## Experimental Section

*Reagents and materials.* Synthesis and characterization of all corroles used in this paper have already been described in the literature.<sup>1</sup> N,N-dimethylformamide and DCM were purchased from Acros and were distilled over calcium hydride prior spectroscopic experiments.

*Spectroscopy Measurements.* UV-Vis data were obtained on Jasco-720 or Cary 17 spectrophotometers. MCD data were recorded using OLIS DCM 17 CD spectropolarimeter with a 1.4 T DeSa magnet. The MCD spectra were measured in mdeg =  $[\theta]$  and converted to  $\Delta\epsilon$  ( $M^{-1} \text{ cm}^{-1} \text{ T}^{-1}$ ) using the regular conversion formula:  $\Delta\epsilon = \theta / (32980 \cdot Bdc)$ , where B is the magnetic field, d is the path length, and c is the concentration. Complete spectra were recorded at room temperature in parallel and anti-parallel directions with respect to the magnetic field. In all cases UV-vis spectra were recorded for samples before and after MCD experiments in order to ensure that samples were stable during experiments.

*DFT-PCM and TDDFT-PCM Calculations.* Calculations were carried out on **5a** and **5b** as well as the simplified tautomers **6a** and **6b** where the phenyl groups are replaced with hydrogen atoms at the three *meso* carbon positions. Geometry optimizations were conducted for both point groups using the polarized continuum model (PCM) approach<sup>2</sup> and DCM and DMF were used as solvent. Converged geometries were tested by frequency calculations in order to confirm the nature of stationary points. Geometries were not restricted in these calculations. All geometry optimizations, single-point DFT-PCM and TDDFT-PCM calculations were conducted using a pure BP86 functional.<sup>3</sup> The first 50 states were considered in all PCM-TDDFT calculations. In all cases, 6-31G(d) basis set was used for all atoms.<sup>4</sup> All calculations were performed using Gaussian 09 software.<sup>5</sup> TDDFT predicted UV-vis spectra profiles were modeled using

GaussView software<sup>6</sup> and 800 cm<sup>-1</sup> bandwidth for all bands. Molecular orbital analysis was conducted using the QMForge program.

## References

1. G.R. Geier III, J.F. B. Chick, J.B. Callinan, C.G. Reid, W.P. Auguscinski, *J. Org. Chem.* 2004, 69, 4159
2. J. Tomasi, B. Mennucci, R. Cammi, *Chem. Rev.*, 2005, 105, 2999-3093.
3. (a) A.D. Becke, *Phys. Rev. A* 1988, 38, 3098-3100. (b) J.P. Perdew, *Phys. Rev. B*, 1986, 33, 8822-8824.
4. A. D. McLean, G.S. Chandler, G. S. *J. Chem. Phys.*, 1980, 72, 5639-5648.
5. Gaussian 09, Revision A.1, M.J. Frisch, G.W. Trucks, H.B. Schlegel, G.E. Scuseria, M.A. Robb, J.R. Cheeseman, G. Scalmani, V. Barone, B. Mennucci, G.A. Petersson, H. Nakatsuji, M. Caricato, X. Li, H.P. Hratchian, A.F. Izmaylov, J. Bloino, G. Zheng, J.L. Sonnenberg, M. Hada, M. Ehara, K. Toyota, R. Fukuda, J. Hasegawa, M. Ishida, T. Nakajima, Y. Honda, O. Kitao, H. Nakai, T. Vreven, J.A. Montgomery, Jr., J.E. Peralta, F. Ogliaro, M. Bearpark, J.J. Heyd, E. Brothers, K.N. Kudin, V.N. Staroverov, R. Kobayashi, J. Normand, K. Raghavachari, A. Rendell, J.C. Burant, S.S. Iyengar, J. Tomasi, M. Cossi, N. Rega, N.J. Millam, M. Klene, J.E. Knox, J.B. Cross, V. Bakken, C. Adamo, J. Jaramillo, R. Gomperts, R.E. Stratmann, O. Yazyev, A.J. Austin, R. Cammi, C. Pomelli, J.W. Ochterski, R.L. Martin, K. Morokuma, V.G. Zakrzewski, V.A. Voth, P. Salvador, J.J. Dannenberg, S. Dapprich, A.D. Daniels, Ö. Farkas, J.B. Foresman, J.V. Ortiz, J. Cioslowski, Fox, Gaussian, Inc., Wallingford CT, 2009.
6. GaussView 5.0. Gaussian, Inc., Wallingford CT, 2009.F

7. A. L. Tenderholt, *QMForge, Version 2.1*. Stanford University, Stanford, CA, USA.

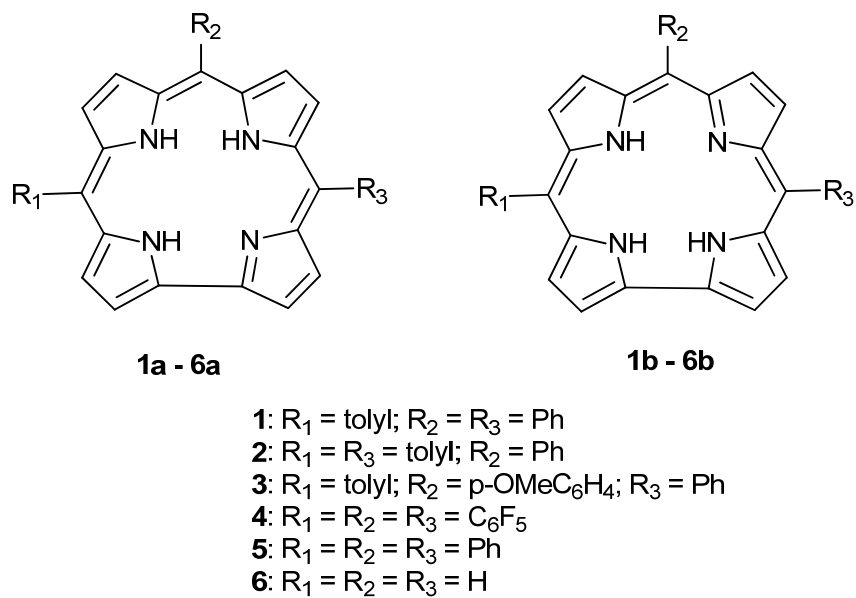

**ESI Figure 1.** Structure of corroles and parent corrole **6**.

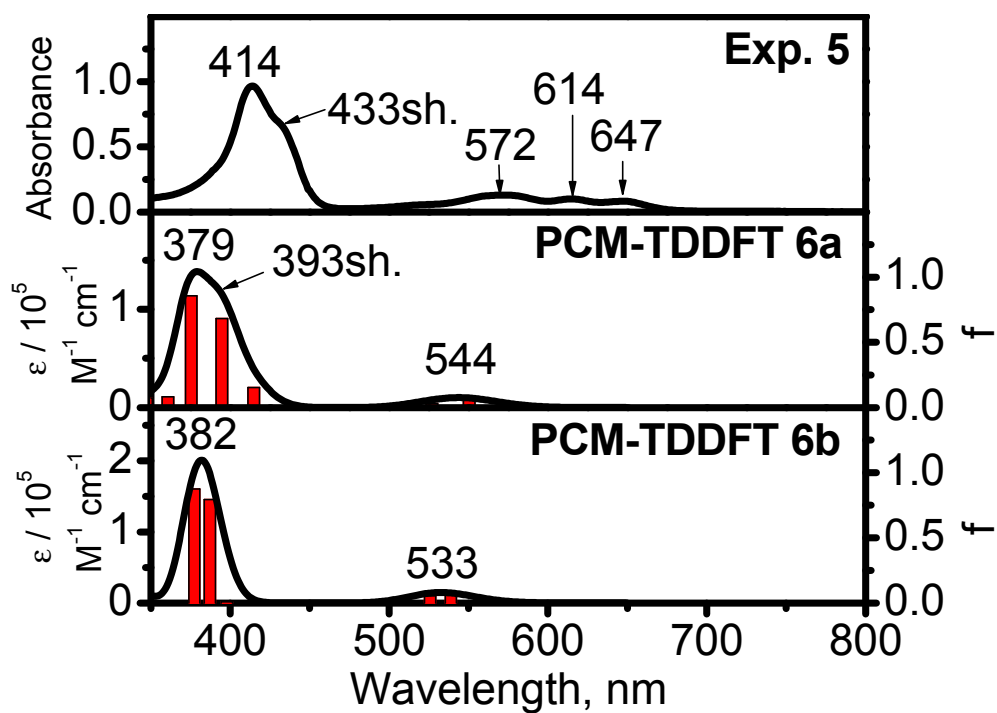

**ESI Figure 2.** Experimental UV-vis spectrum of **5** (top) and PCM-TDDFT predicted UV-vis spectra of individual tautomers of parent corroles **6a** and **6b** in DCM.

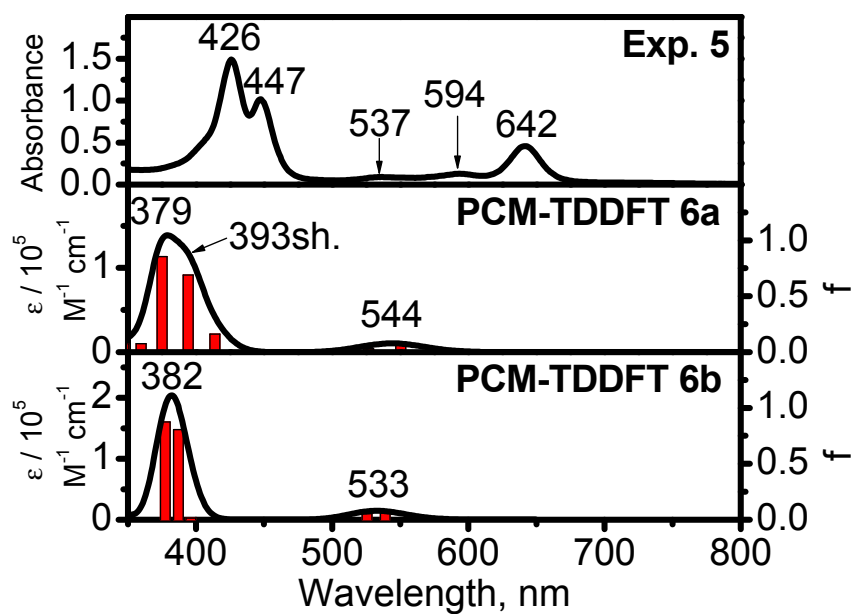

**ESI Figure 3.** Experimental UV-vis spectrum of **5** (top) and PCM-TDDFT predicted UV-vis spectra of individual tautomers of parent corroles **6a** and **6b** in DMF.

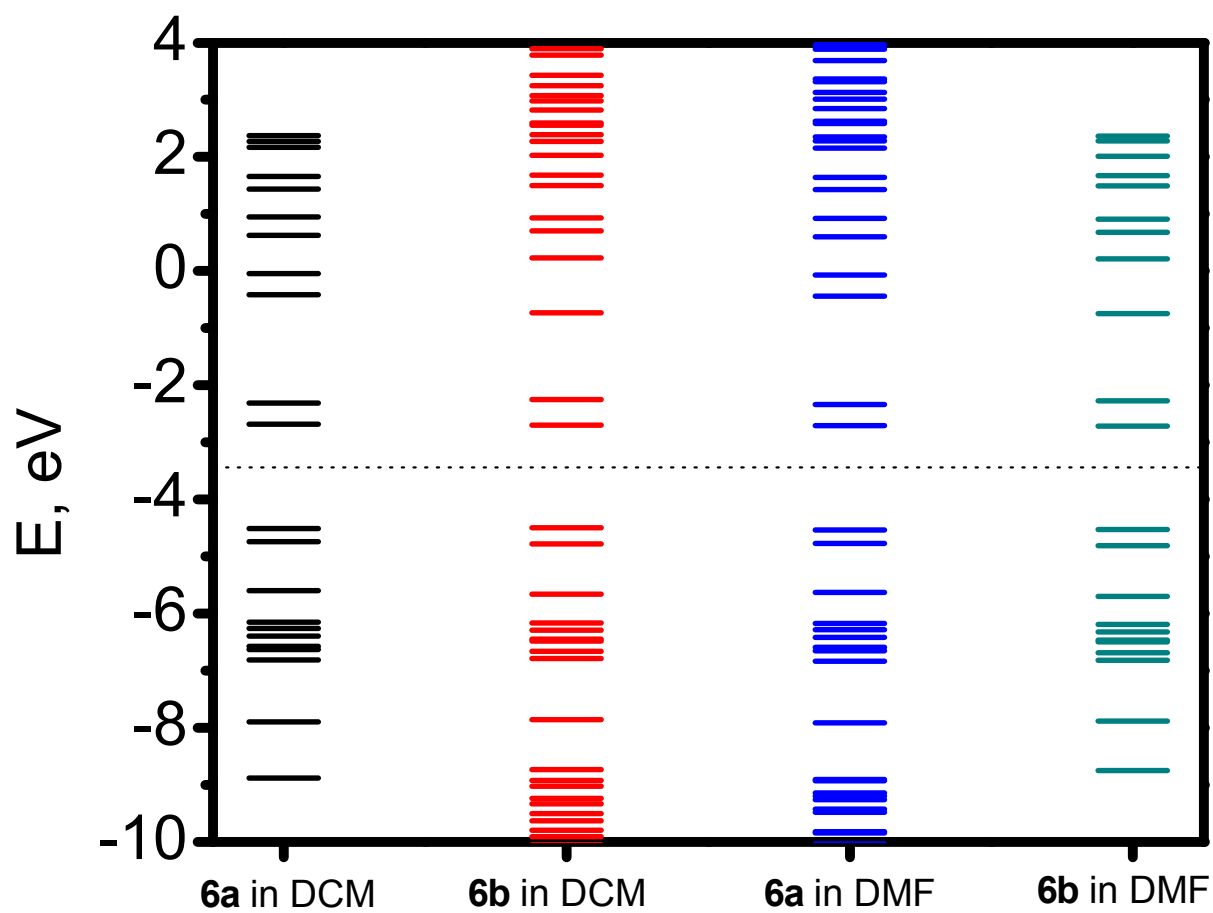

**ESI Figure 4.** PCM-DFT predicted energies of individual tautomers of parent corroles **6a** and **6b** in DCM and DMF.



### Corrole 6a in DCM

#### Coordinates:

|   |          |          |          |
|---|----------|----------|----------|
| C | -2.64384 | 2.92359  | 0.27198  |
| C | -3.60258 | 1.91126  | 0.318    |
| C | -2.96842 | 0.68304  | -0.00667 |
| C | -1.41009 | 2.33587  | -0.08855 |
| C | -0.02293 | 2.6684   | -0.12798 |
| C | 2.08594  | 2.0966   | -0.13503 |
| C | 2.04574  | 3.53819  | -0.0513  |
| C | 0.71953  | 3.89599  | -0.03667 |
| C | -3.36313 | -0.67117 | 0.00985  |
| C | -2.46731 | -1.73527 | -0.00946 |
| C | -2.71732 | -3.12798 | -0.18805 |
| C | -1.5201  | -3.80109 | -0.16606 |
| C | -0.46635 | -2.85832 | 0.03132  |
| C | 0.90378  | -3.09016 | 0.08678  |
| C | 1.95126  | -2.15182 | 0.09689  |
| C | 3.35626  | -2.40995 | 0.17873  |
| C | 4.02476  | -1.20684 | 0.13021  |
| C | 3.05366  | -0.16961 | 0.01595  |
| C | 3.182    | 1.2237   | -0.05495 |
| N | -1.67236 | 1.01367  | -0.27522 |
| H | -0.99104 | 0.40515  | -0.70092 |
| N | 0.81307  | 1.61583  | -0.20132 |
| N | 1.82888  | -0.79592 | 0.00566  |
| H | 1.01298  | -0.19263 | -0.12907 |
| N | -1.07568 | -1.61237 | 0.09918  |
| H | -0.6905  | -0.8975  | 0.70488  |
| H | 4.18484  | 1.63796  | -0.00776 |
| H | 1.20771  | -4.13245 | 0.08977  |
| H | -4.42126 | -0.90799 | 0.04903  |
| H | 3.79064  | -3.39723 | 0.27072  |
| H | 5.09523  | -1.05165 | 0.17261  |
| H | 2.90392  | 4.19703  | 0.01327  |
| H | 0.3061   | 4.895    | 0.02946  |
| H | -2.79644 | 3.96508  | 0.52263  |
| H | -4.63869 | 2.01878  | 0.61194  |
| H | -3.69839 | -3.55202 | -0.36075 |
| H | -1.36772 | -4.86267 | -0.31386 |

**Frequencies:**

|             |    |         |         |         |
|-------------|----|---------|---------|---------|
|             |    | 1       | 2       | 3       |
| Frequencies | -- | 68.6649 | 75.5566 | 92.9392 |

**TDDFT data:**

| Order | Symm      | f      | Energy_eV | Energy_nm | Energy_cm-1 | Transition | Coef     |
|-------|-----------|--------|-----------|-----------|-------------|------------|----------|
| 1     | Singlet-A | 0.0569 | 2.2524    | 550.47    | 18166.3     |            |          |
| =     | =         | =      | =         | =         | =           | 77->79     | -0.20942 |
| =     | =         | =      | =         | =         | =           | 77->80     | 0.31593  |
| =     | =         | =      | =         | =         | =           | 78->79     | 0.56338  |
| =     | =         | =      | =         | =         | =           | 78->80     | 0.18418  |
| 2     | Singlet-A | 0.0298 | 2.3523    | 527.07    | 18972.8     |            |          |
| =     | =         | =      | =         | =         | =           | 77->79     | 0.48211  |
| =     | =         | =      | =         | =         | =           | 77->80     | 0.13526  |
| =     | =         | =      | =         | =         | =           | 78->79     | 0.24323  |
| =     | =         | =      | =         | =         | =           | 78->80     | -0.42792 |
| 3     | Singlet-A | 0.1526 | 2.9885    | 414.88    | 24103.4     |            |          |
| =     | =         | =      | =         | =         | =           | 76->79     | 0.59056  |
| =     | =         | =      | =         | =         | =           | 77->79     | 0.2307   |
| =     | =         | =      | =         | =         | =           | 77->80     | 0.1617   |
| =     | =         | =      | =         | =         | =           | 78->80     | 0.24248  |
| 4     | Singlet-A | 0.6826 | 3.1403    | 394.82    | 25328       |            |          |
| =     | =         | =      | =         | =         | =           | 76->80     | 0.14678  |
| =     | =         | =      | =         | =         | =           | 77->79     | -0.21266 |
| =     | =         | =      | =         | =         | =           | 77->80     | 0.51406  |
| =     | =         | =      | =         | =         | =           | 78->79     | -0.29186 |
| =     | =         | =      | =         | =         | =           | 78->80     | -0.24199 |
| 5     | Singlet-A | 0.8576 | 3.3021    | 375.48    | 26632.6     |            |          |
| =     | =         | =      | =         | =         | =           | 76->79     | -0.35113 |
| =     | =         | =      | =         | =         | =           | 76->80     | 0.13107  |
| =     | =         | =      | =         | =         | =           | 77->79     | 0.34821  |
| =     | =         | =      | =         | =         | =           | 77->80     | 0.22089  |
| =     | =         | =      | =         | =         | =           | 78->79     | -0.15058 |
| =     | =         | =      | =         | =         | =           | 78->80     | 0.39459  |
| 6     | Singlet-A | 0.083  | 3.4369    | 360.74    | 27720.8     |            |          |
| =     | =         | =      | =         | =         | =           | 74->79     | -0.10327 |
| =     | =         | =      | =         | =         | =           | 75->79     | -0.18199 |
| =     | =         | =      | =         | =         | =           | 76->79     | 0.11822  |
| =     | =         | =      | =         | =         | =           | 76->80     | 0.64387  |
| =     | =         | =      | =         | =         | =           | 77->80     | -0.11101 |

|   |    |           |        |        |        |         |        |          |
|---|----|-----------|--------|--------|--------|---------|--------|----------|
|   | 7  | Singlet-A | 0.0713 | 3.5706 | 347.24 | 28798.5 |        |          |
| = | =  | =         | =      | =      | =      | =       | 73->79 | 0.22186  |
| = | =  | =         | =      | =      | =      | =       | 75->79 | 0.62935  |
| = | =  | =         | =      | =      | =      | =       | 76->80 | 0.15392  |
|   | 8  | Singlet-A | 0.0432 | 3.7279 | 332.59 | 30067   |        |          |
| = | =  | =         | =      | =      | =      | =       | 73->79 | 0.1109   |
| = | =  | =         | =      | =      | =      | =       | 74->79 | 0.66401  |
| = | =  | =         | =      | =      | =      | =       | 75->79 | -0.15392 |
|   | 9  | Singlet-A | 0.0335 | 3.8265 | 324.01 | 30863.2 |        |          |
| = | =  | =         | =      | =      | =      | =       | 73->79 | 0.63085  |
| = | =  | =         | =      | =      | =      | =       | 74->79 | -0.13232 |
| = | =  | =         | =      | =      | =      | =       | 75->79 | -0.16831 |
| = | =  | =         | =      | =      | =      | =       | 75->80 | -0.2032  |
|   | 10 | Singlet-A | 0.0328 | 3.9261 | 315.79 | 31666.6 |        |          |
| = | =  | =         | =      | =      | =      | =       | 73->79 | 0.17489  |
| = | =  | =         | =      | =      | =      | =       | 74->80 | 0.14619  |
| = | =  | =         | =      | =      | =      | =       | 75->80 | 0.64216  |
| = | =  | =         | =      | =      | =      | =       | 78->81 | 0.10779  |
|   | 11 | Singlet-A | 0.0169 | 4.041  | 306.81 | 32593.5 |        |          |
| = | =  | =         | =      | =      | =      | =       | 71->79 | -0.16484 |
| = | =  | =         | =      | =      | =      | =       | 72->79 | 0.64805  |
| = | =  | =         | =      | =      | =      | =       | 74->80 | -0.11089 |
|   | 12 | Singlet-A | 0.0333 | 4.1255 | 300.53 | 33274.5 |        |          |
| = | =  | =         | =      | =      | =      | =       | 71->79 | 0.43439  |
| = | =  | =         | =      | =      | =      | =       | 73->80 | -0.26976 |
| = | =  | =         | =      | =      | =      | =       | 74->80 | 0.33085  |
| = | =  | =         | =      | =      | =      | =       | 77->81 | 0.13494  |
| = | =  | =         | =      | =      | =      | =       | 78->81 | 0.26256  |
|   | 13 | Singlet-A | 0.0205 | 4.131  | 300.13 | 33318.9 |        |          |
| = | =  | =         | =      | =      | =      | =       | 72->79 | 0.13472  |
| = | =  | =         | =      | =      | =      | =       | 73->80 | 0.45415  |
| = | =  | =         | =      | =      | =      | =       | 74->80 | 0.45792  |
| = | =  | =         | =      | =      | =      | =       | 75->80 | -0.1336  |
| = | =  | =         | =      | =      | =      | =       | 78->81 | -0.16887 |
|   | 14 | Singlet-A | 0.0109 | 4.2022 | 295.05 | 33892.6 |        |          |
| = | =  | =         | =      | =      | =      | =       | 71->79 | 0.32074  |
| = | =  | =         | =      | =      | =      | =       | 73->80 | 0.43038  |
| = | =  | =         | =      | =      | =      | =       | 74->80 | -0.33162 |
| = | =  | =         | =      | =      | =      | =       | 78->81 | 0.21504  |
| = | =  | =         | =      | =      | =      | =       | 78->82 | -0.10927 |
|   | 15 | Singlet-A | 0.0791 | 4.3067 | 287.89 | 34735.5 |        |          |
| = | =  | =         | =      | =      | =      | =       | 70->79 | 0.29857  |
| = | =  | =         | =      | =      | =      | =       | 71->79 | -0.26486 |

|   |    |           |        |        |        |         |          |
|---|----|-----------|--------|--------|--------|---------|----------|
| = | =  | =         | =      | =      | =      | 71->80  | -0.11545 |
| = | =  | =         | =      | =      | =      | 77->81  | -0.19132 |
| = | =  | =         | =      | =      | =      | 78->81  | 0.43323  |
| = | =  | =         | =      | =      | =      | 78->82  | 0.21321  |
|   | 16 | Singlet-A | 0.0116 | 4.3516 | 284.92 | 35097.6 |          |
| = | =  | =         | =      | =      | =      | 70->79  | 0.48929  |
| = | =  | =         | =      | =      | =      | 71->80  | 0.41648  |
| = | =  | =         | =      | =      | =      | 72->80  | 0.11498  |
| = | =  | =         | =      | =      | =      | 78->81  | -0.16216 |
|   | 17 | Singlet-A | 0.057  | 4.4566 | 278.2  | 35945.4 |          |
| = | =  | =         | =      | =      | =      | 70->80  | 0.14239  |
| = | =  | =         | =      | =      | =      | 71->80  | -0.13904 |
| = | =  | =         | =      | =      | =      | 72->80  | 0.64405  |
|   | 18 | Singlet-A | 0.0152 | 4.5845 | 270.44 | 36976.8 |          |
| = | =  | =         | =      | =      | =      | 70->80  | 0.39751  |
| = | =  | =         | =      | =      | =      | 71->79  | -0.20113 |
| = | =  | =         | =      | =      | =      | 71->80  | 0.23185  |
| = | =  | =         | =      | =      | =      | 72->80  | -0.12968 |
| = | =  | =         | =      | =      | =      | 77->81  | 0.42041  |
| = | =  | =         | =      | =      | =      | 78->81  | 0.14216  |
|   | 19 | Singlet-A | 0.1737 | 4.6554 | 266.32 | 37548.8 |          |
| = | =  | =         | =      | =      | =      | 70->79  | -0.1358  |
| = | =  | =         | =      | =      | =      | 70->80  | -0.34427 |
| = | =  | =         | =      | =      | =      | 77->81  | 0.26385  |
| = | =  | =         | =      | =      | =      | 77->82  | -0.14431 |
| = | =  | =         | =      | =      | =      | 78->82  | 0.48268  |
|   | 20 | Singlet-A | 0.1505 | 4.7366 | 261.76 | 38202.9 |          |
| = | =  | =         | =      | =      | =      | 70->79  | 0.1374   |
| = | =  | =         | =      | =      | =      | 70->80  | 0.12542  |
| = | =  | =         | =      | =      | =      | 71->80  | -0.32952 |
| = | =  | =         | =      | =      | =      | 77->81  | 0.22579  |
| = | =  | =         | =      | =      | =      | 77->82  | 0.44613  |
| = | =  | =         | =      | =      | =      | 78->81  | -0.20857 |
| = | =  | =         | =      | =      | =      | 78->82  | 0.17857  |
|   | 21 | Singlet-A | 0.0708 | 5.0964 | 243.28 | 41104.9 |          |
| = | =  | =         | =      | =      | =      | 70->79  | -0.21215 |
| = | =  | =         | =      | =      | =      | 71->80  | 0.20807  |
| = | =  | =         | =      | =      | =      | 72->80  | 0.1069   |
| = | =  | =         | =      | =      | =      | 77->81  | -0.18349 |
| = | =  | =         | =      | =      | =      | 77->82  | 0.31749  |
| = | =  | =         | =      | =      | =      | 78->82  | 0.14614  |
| = | =  | =         | =      | =      | =      | 78->83  | 0.43137  |
|   | 22 | Singlet-A | 0.0159 | 5.2301 | 237.06 | 42183.4 |          |

|   |    |           |        |        |        |         |          |
|---|----|-----------|--------|--------|--------|---------|----------|
| = | =  | =         | =      | =      | =      | 69->79  | 0.25335  |
| = | =  | =         | =      | =      | =      | 70->80  | 0.30715  |
| = | =  | =         | =      | =      | =      | 71->79  | 0.17526  |
| = | =  | =         | =      | =      | =      | 72->79  | 0.11386  |
| = | =  | =         | =      | =      | =      | 77->81  | -0.22218 |
| = | =  | =         | =      | =      | =      | 77->82  | -0.25751 |
| = | =  | =         | =      | =      | =      | 78->81  | -0.12159 |
| = | =  | =         | =      | =      | =      | 78->82  | 0.28311  |
| = | =  | =         | =      | =      | =      | 78->84  | 0.16513  |
|   | 23 | Singlet-A | 0.0139 | 5.3288 | 232.67 | 42979.3 |          |
| = | =  | =         | =      | =      | =      | 69->79  | -0.17498 |
| = | =  | =         | =      | =      | =      | 71->80  | -0.1388  |
| = | =  | =         | =      | =      | =      | 76->81  | 0.41039  |
| = | =  | =         | =      | =      | =      | 76->82  | -0.14464 |
| = | =  | =         | =      | =      | =      | 77->82  | -0.16543 |
| = | =  | =         | =      | =      | =      | 78->83  | 0.41213  |
| = | =  | =         | =      | =      | =      | 78->84  | -0.13456 |
|   | 24 | Singlet-A | 0.0376 | 5.4398 | 227.92 | 43875   |          |
| = | =  | =         | =      | =      | =      | 69->79  | 0.42738  |
| = | =  | =         | =      | =      | =      | 76->81  | 0.26498  |
| = | =  | =         | =      | =      | =      | 77->83  | 0.44708  |
|   | 25 | Singlet-A | 0.0732 | 5.5172 | 224.72 | 44499.8 |          |
| = | =  | =         | =      | =      | =      | 69->79  | -0.2025  |
| = | =  | =         | =      | =      | =      | 69->80  | 0.10167  |
| = | =  | =         | =      | =      | =      | 70->79  | -0.1515  |
| = | =  | =         | =      | =      | =      | 71->80  | 0.12605  |
| = | =  | =         | =      | =      | =      | 76->81  | 0.37717  |
| = | =  | =         | =      | =      | =      | 76->82  | -0.22845 |
| = | =  | =         | =      | =      | =      | 77->82  | 0.15977  |
| = | =  | =         | =      | =      | =      | 77->83  | -0.11634 |
| = | =  | =         | =      | =      | =      | 78->83  | -0.28957 |
| = | =  | =         | =      | =      | =      | 78->84  | 0.12115  |
|   | 26 | Singlet-A | 0.026  | 5.5824 | 222.1  | 45024.8 |          |
| = | =  | =         | =      | =      | =      | 69->79  | 0.13164  |
| = | =  | =         | =      | =      | =      | 70->80  | -0.15611 |
| = | =  | =         | =      | =      | =      | 77->81  | 0.10348  |
| = | =  | =         | =      | =      | =      | 77->83  | -0.18365 |
| = | =  | =         | =      | =      | =      | 78->82  | -0.13972 |
| = | =  | =         | =      | =      | =      | 78->83  | 0.13292  |
| = | =  | =         | =      | =      | =      | 78->84  | 0.57683  |
|   | 27 | Singlet-A | 0.0418 | 5.6732 | 218.54 | 45758.2 |          |
| = | =  | =         | =      | =      | =      | 69->79  | 0.16828  |
| = | =  | =         | =      | =      | =      | 76->81  | 0.21865  |

|   |    |           |        |        |        |         |          |
|---|----|-----------|--------|--------|--------|---------|----------|
| = | =  | =         | =      | =      | =      | 76->82  | 0.42822  |
| = | =  | =         | =      | =      | =      | 77->83  | -0.32127 |
| = | =  | =         | =      | =      | =      | 77->84  | 0.25854  |
| = | =  | =         | =      | =      | =      | 78->84  | -0.1482  |
|   | 28 | Singlet-A | 0.0281 | 5.7006 | 217.5  | 45977   |          |
| = | =  | =         | =      | =      | =      | 69->79  | -0.24204 |
| = | =  | =         | =      | =      | =      | 69->80  | -0.1874  |
| = | =  | =         | =      | =      | =      | 70->80  | 0.11949  |
| = | =  | =         | =      | =      | =      | 76->81  | 0.12715  |
| = | =  | =         | =      | =      | =      | 76->82  | 0.44181  |
| = | =  | =         | =      | =      | =      | 77->83  | 0.27529  |
| = | =  | =         | =      | =      | =      | 77->84  | -0.12162 |
| = | =  | =         | =      | =      | =      | 78->84  | 0.18776  |
|   | 29 | Singlet-A | 0.0154 | 5.8509 | 211.91 | 47189.8 |          |
| = | =  | =         | =      | =      | =      | 69->79  | -0.10906 |
| = | =  | =         | =      | =      | =      | 69->80  | 0.53936  |
| = | =  | =         | =      | =      | =      | 71->81  | -0.10847 |
| = | =  | =         | =      | =      | =      | 74->81  | 0.13542  |
| = | =  | =         | =      | =      | =      | 77->83  | 0.12877  |
| = | =  | =         | =      | =      | =      | 77->84  | 0.18091  |
| = | =  | =         | =      | =      | =      | 78->84  | 0.11736  |
| = | =  | =         | =      | =      | =      | 78->85  | -0.12942 |
| = | =  | =         | =      | =      | =      | 78->86  | 0.16039  |
|   | 30 | Singlet-A | 0.0249 | 5.8762 | 210.99 | 47395.6 |          |
| = | =  | =         | =      | =      | =      | 69->80  | -0.11423 |
| = | =  | =         | =      | =      | =      | 73->81  | 0.30988  |
| = | =  | =         | =      | =      | =      | 75->81  | 0.58724  |
|   | 31 | Singlet-A | 0.0043 | 5.9275 | 209.17 | 47808   |          |
| = | =  | =         | =      | =      | =      | 69->80  | -0.16044 |
| = | =  | =         | =      | =      | =      | 74->81  | 0.49974  |
| = | =  | =         | =      | =      | =      | 77->84  | 0.32635  |
| = | =  | =         | =      | =      | =      | 78->85  | 0.27596  |
|   | 32 | Singlet-A | 0.0026 | 5.9495 | 208.39 | 47986.9 |          |
| = | =  | =         | =      | =      | =      | 74->81  | -0.39284 |
| = | =  | =         | =      | =      | =      | 75->82  | 0.13034  |
| = | =  | =         | =      | =      | =      | 77->84  | 0.21958  |
| = | =  | =         | =      | =      | =      | 78->85  | 0.46349  |
|   | 33 | Singlet-A | 0.0056 | 6.0225 | 205.87 | 48574.3 |          |
| = | =  | =         | =      | =      | =      | 69->80  | 0.15741  |
| = | =  | =         | =      | =      | =      | 73->81  | 0.17324  |
| = | =  | =         | =      | =      | =      | 74->81  | 0.13075  |
| = | =  | =         | =      | =      | =      | 77->84  | -0.37098 |
| = | =  | =         | =      | =      | =      | 78->85  | 0.39958  |

|   |    |           |        |        |        |         |          |
|---|----|-----------|--------|--------|--------|---------|----------|
| = | =  | =         | =      | =      | =      | 78->86  | 0.22039  |
|   | 34 | Singlet-A | 0.003  | 6.1777 | 200.7  | 49825.6 |          |
| = | =  | =         | =      | =      | =      | 72->81  | -0.12256 |
| = | =  | =         | =      | =      | =      | 73->81  | 0.32236  |
| = | =  | =         | =      | =      | =      | 75->82  | 0.47158  |
| = | =  | =         | =      | =      | =      | 77->85  | -0.33045 |
|   | 35 | Singlet-A | 0.0038 | 6.215  | 199.49 | 50127.8 |          |
| = | =  | =         | =      | =      | =      | 73->81  | 0.13264  |
| = | =  | =         | =      | =      | =      | 75->82  | 0.28007  |
| = | =  | =         | =      | =      | =      | 77->85  | 0.5978   |
| = | =  | =         | =      | =      | =      | 77->86  | 0.11421  |
|   | 36 | Singlet-A | 0.0001 | 6.2471 | 198.47 | 50385.4 |          |
| = | =  | =         | =      | =      | =      | 67->79  | 0.3152   |
| = | =  | =         | =      | =      | =      | 68->79  | 0.62635  |
|   | 37 | Singlet-A | 0.0095 | 6.2548 | 198.22 | 50449   |          |
| = | =  | =         | =      | =      | =      | 67->79  | 0.35224  |
| = | =  | =         | =      | =      | =      | 68->79  | -0.20764 |
| = | =  | =         | =      | =      | =      | 72->81  | -0.3195  |
| = | =  | =         | =      | =      | =      | 73->81  | 0.17324  |
| = | =  | =         | =      | =      | =      | 73->82  | -0.20799 |
| = | =  | =         | =      | =      | =      | 74->82  | -0.14041 |
| = | =  | =         | =      | =      | =      | 75->81  | -0.12048 |
| = | =  | =         | =      | =      | =      | 75->82  | -0.21633 |
| = | =  | =         | =      | =      | =      | 78->86  | -0.19716 |
|   | 38 | Singlet-A | 0.0083 | 6.2636 | 197.94 | 50520.4 |          |
| = | =  | =         | =      | =      | =      | 67->79  | 0.48726  |
| = | =  | =         | =      | =      | =      | 68->79  | -0.2284  |
| = | =  | =         | =      | =      | =      | 73->81  | -0.16435 |
| = | =  | =         | =      | =      | =      | 73->82  | 0.20228  |
| = | =  | =         | =      | =      | =      | 74->82  | 0.17642  |
| = | =  | =         | =      | =      | =      | 75->81  | 0.10595  |
| = | =  | =         | =      | =      | =      | 75->82  | 0.16211  |
| = | =  | =         | =      | =      | =      | 76->83  | -0.20997 |
|   | 39 | Singlet-A | 0.0214 | 6.2977 | 196.87 | 50794.9 |          |
| = | =  | =         | =      | =      | =      | 67->79  | 0.10474  |
| = | =  | =         | =      | =      | =      | 71->81  | -0.31275 |
| = | =  | =         | =      | =      | =      | 72->81  | 0.49588  |
| = | =  | =         | =      | =      | =      | 72->82  | 0.1361   |
| = | =  | =         | =      | =      | =      | 73->81  | 0.17448  |
| = | =  | =         | =      | =      | =      | 73->82  | -0.12179 |
| = | =  | =         | =      | =      | =      | 78->86  | -0.13719 |
|   | 40 | Singlet-A | 0.0275 | 6.3074 | 196.57 | 50872.5 |          |
| = | =  | =         | =      | =      | =      | 67->79  | 0.1486   |

|   |   |   |   |   |   |        |          |
|---|---|---|---|---|---|--------|----------|
| = | = | = | = | = | = | 69->80 | -0.10107 |
| = | = | = | = | = | = | 70->82 | -0.11798 |
| = | = | = | = | = | = | 71->81 | 0.23267  |
| = | = | = | = | = | = | 72->81 | 0.14209  |
| = | = | = | = | = | = | 74->82 | -0.20085 |
| = | = | = | = | = | = | 76->83 | 0.22739  |
| = | = | = | = | = | = | 76->84 | -0.11462 |
| = | = | = | = | = | = | 78->86 | 0.4783   |

### Corrole 6a in DMF

#### Coordinates:

|   |          |          |          |
|---|----------|----------|----------|
| C | -2.64331 | 2.92562  | 0.26921  |
| C | -3.60229 | 1.91335  | 0.31598  |
| C | -2.96769 | 0.6843   | -0.00535 |
| C | -1.40903 | 2.33684  | -0.08849 |
| C | -0.02161 | 2.66921  | -0.12805 |
| C | 2.08754  | 2.09617  | -0.13457 |
| C | 2.04797  | 3.53766  | -0.05118 |
| C | 0.72143  | 3.89626  | -0.03717 |
| C | -3.36348 | -0.66969 | 0.01121  |
| C | -2.46834 | -1.73444 | -0.00833 |
| C | -2.71907 | -3.12683 | -0.18932 |
| C | -1.52208 | -3.80053 | -0.16814 |
| C | -0.46806 | -2.8584  | 0.03143  |
| C | 0.90213  | -3.0911  | 0.08676  |
| C | 1.94994  | -2.15312 | 0.09717  |
| C | 3.35516  | -2.41197 | 0.17764  |
| C | 4.02428  | -1.20918 | 0.12912  |
| C | 3.05359  | -0.17105 | 0.01595  |
| C | 3.18331  | 1.22208  | -0.05476 |
| N | -1.67117 | 1.01427  | -0.27265 |
| H | -0.98883 | 0.40379  | -0.69381 |
| N | 0.81426  | 1.61598  | -0.20089 |
| N | 1.82818  | -0.79694 | 0.00637  |
| H | 1.01193  | -0.19384 | -0.12605 |
| N | -1.07648 | -1.61205 | 0.10111  |
| H | -0.69246 | -0.90088 | 0.71197  |
| H | 4.18658  | 1.63534  | -0.00792 |
| H | 1.20555  | -4.13353 | 0.08888  |
| H | -4.4219  | -0.90534 | 0.04963  |



|   |          |          |          |
|---|----------|----------|----------|
| H | 3.78908  | -3.39956 | 0.26859  |
| H | 5.09487  | -1.05448 | 0.17058  |
| H | 2.90649  | 4.19608  | 0.01352  |
| H | 0.3084   | 4.89548  | 0.02888  |
| H | -2.79622 | 3.96783  | 0.51673  |
| H | -4.63904 | 2.02147  | 0.60742  |
| H | -3.7002  | -3.55033 | -0.36301 |
| H | -1.3701  | -4.86193 | -0.31763 |

### Frequencies:

|             |    |         |         |         |
|-------------|----|---------|---------|---------|
|             |    | 1       | 2       | 3       |
| Frequencies | -- | 68.0869 | 75.3753 | 92.9302 |

### TDDFT:

| Order | Symm      | f      | Energy_eV | Energy_nm | Energy_cm-1 | Transition | Coef     |
|-------|-----------|--------|-----------|-----------|-------------|------------|----------|
| 1     | Singlet-A | 0.059  | 2.2522    | 550.49    | 18165.6     |            |          |
| =     | =         | =      | =         | =         | =           | 77->79     | -0.20233 |
| =     | =         | =      | =         | =         | =           | 77->80     | 0.31702  |
| =     | =         | =      | =         | =         | =           | 78->79     | 0.5676   |
| =     | =         | =      | =         | =         | =           | 78->80     | 0.17757  |
| 2     | Singlet-A | 0.0295 | 2.3537    | 526.77    | 18983.6     |            |          |
| =     | =         | =      | =         | =         | =           | 77->79     | 0.48619  |
| =     | =         | =      | =         | =         | =           | 77->80     | 0.13019  |
| =     | =         | =      | =         | =         | =           | 78->79     | 0.23502  |
| =     | =         | =      | =         | =         | =           | 78->80     | -0.42954 |
| 3     | Singlet-A | 0.161  | 2.9948    | 414       | 24154.6     |            |          |
| =     | =         | =      | =         | =         | =           | 76->79     | 0.58704  |
| =     | =         | =      | =         | =         | =           | 77->79     | 0.23404  |
| =     | =         | =      | =         | =         | =           | 77->80     | 0.16325  |
| =     | =         | =      | =         | =         | =           | 78->80     | 0.2471   |
| 4     | Singlet-A | 0.6905 | 3.1435    | 394.41    | 25354.3     |            |          |
| =     | =         | =      | =         | =         | =           | 76->80     | 0.14149  |
| =     | =         | =      | =         | =         | =           | 77->79     | -0.211   |
| =     | =         | =      | =         | =         | =           | 77->80     | 0.51659  |
| =     | =         | =      | =         | =         | =           | 78->79     | -0.29226 |
| =     | =         | =      | =         | =         | =           | 78->80     | -0.24071 |
| 5     | Singlet-A | 0.855  | 3.3041    | 375.24    | 26649.6     |            |          |
| =     | =         | =      | =         | =         | =           | 76->79     | -0.3593  |

|   |    |           |        |        |        |         |          |
|---|----|-----------|--------|--------|--------|---------|----------|
| = | =  | =         | =      | =      | =      | 76->80  | 0.12147  |
| = | =  | =         | =      | =      | =      | 77->79  | 0.34566  |
| = | =  | =         | =      | =      | =      | 77->80  | 0.21909  |
| = | =  | =         | =      | =      | =      | 78->79  | -0.14914 |
| = | =  | =         | =      | =      | =      | 78->80  | 0.39392  |
|   | 6  | Singlet-A | 0.074  | 3.4458 | 359.81 | 27792.4 |          |
| = | =  | =         | =      | =      | =      | 74->79  | -0.10653 |
| = | =  | =         | =      | =      | =      | 75->79  | -0.18768 |
| = | =  | =         | =      | =      | =      | 76->79  | 0.11161  |
| = | =  | =         | =      | =      | =      | 76->80  | 0.64499  |
| = | =  | =         | =      | =      | =      | 77->80  | -0.10292 |
|   | 7  | Singlet-A | 0.0719 | 3.5733 | 346.98 | 28820.1 |          |
| = | =  | =         | =      | =      | =      | 73->79  | 0.22456  |
| = | =  | =         | =      | =      | =      | 75->79  | 0.62666  |
| = | =  | =         | =      | =      | =      | 76->80  | 0.16136  |
|   | 8  | Singlet-A | 0.0429 | 3.7289 | 332.49 | 30076.1 |          |
| = | =  | =         | =      | =      | =      | 73->79  | 0.12569  |
| = | =  | =         | =      | =      | =      | 74->79  | 0.66051  |
| = | =  | =         | =      | =      | =      | 75->79  | -0.15789 |
|   | 9  | Singlet-A | 0.0345 | 3.8232 | 324.29 | 30836.6 |          |
| = | =  | =         | =      | =      | =      | 73->79  | 0.63052  |
| = | =  | =         | =      | =      | =      | 74->79  | -0.14776 |
| = | =  | =         | =      | =      | =      | 75->79  | -0.16804 |
| = | =  | =         | =      | =      | =      | 75->80  | -0.19233 |
|   | 10 | Singlet-A | 0.0316 | 3.9313 | 315.38 | 31707.8 |          |
| = | =  | =         | =      | =      | =      | 73->79  | 0.16345  |
| = | =  | =         | =      | =      | =      | 74->80  | 0.1467   |
| = | =  | =         | =      | =      | =      | 75->80  | 0.64226  |
| = | =  | =         | =      | =      | =      | 78->81  | 0.11182  |
|   | 11 | Singlet-A | 0.0196 | 4.0308 | 307.59 | 32510.8 |          |
| = | =  | =         | =      | =      | =      | 71->79  | -0.12983 |
| = | =  | =         | =      | =      | =      | 72->79  | 0.65963  |
| = | =  | =         | =      | =      | =      | 74->80  | -0.10654 |
|   | 12 | Singlet-A | 0.0337 | 4.1243 | 300.62 | 33264.6 |          |
| = | =  | =         | =      | =      | =      | 71->79  | 0.44573  |
| = | =  | =         | =      | =      | =      | 73->80  | -0.30662 |
| = | =  | =         | =      | =      | =      | 74->80  | 0.27049  |
| = | =  | =         | =      | =      | =      | 77->81  | 0.13399  |
| = | =  | =         | =      | =      | =      | 78->81  | 0.28534  |
|   | 13 | Singlet-A | 0.017  | 4.1339 | 299.92 | 33342.2 |          |
| = | =  | =         | =      | =      | =      | 72->79  | 0.12548  |
| = | =  | =         | =      | =      | =      | 73->80  | 0.42953  |
| = | =  | =         | =      | =      | =      | 74->80  | 0.48763  |

|    |           |        |        |        |         |        |          |
|----|-----------|--------|--------|--------|---------|--------|----------|
| =  | =         | =      | =      | =      | =       | 75->80 | -0.14211 |
| =  | =         | =      | =      | =      | =       | 78->81 | -0.14542 |
| 14 | Singlet-A | 0.0108 | 4.2036 | 294.95 | 33904.1 |        |          |
| =  | =         | =      | =      | =      | =       | 71->79 | 0.31156  |
| =  | =         | =      | =      | =      | =       | 73->80 | 0.43304  |
| =  | =         | =      | =      | =      | =       | 74->80 | -0.34529 |
| =  | =         | =      | =      | =      | =       | 78->81 | 0.20648  |
| =  | =         | =      | =      | =      | =       | 78->82 | 0.10989  |
| 15 | Singlet-A | 0.0811 | 4.3042 | 288.05 | 34716.2 |        |          |
| =  | =         | =      | =      | =      | =       | 70->79 | 0.28862  |
| =  | =         | =      | =      | =      | =       | 71->79 | -0.2698  |
| =  | =         | =      | =      | =      | =       | 71->80 | -0.12765 |
| =  | =         | =      | =      | =      | =       | 74->80 | 0.10156  |
| =  | =         | =      | =      | =      | =       | 77->81 | -0.18795 |
| =  | =         | =      | =      | =      | =       | 78->81 | 0.43872  |
| =  | =         | =      | =      | =      | =       | 78->82 | -0.20777 |
| 16 | Singlet-A | 0.0101 | 4.3537 | 284.78 | 35114.8 |        |          |
| =  | =         | =      | =      | =      | =       | 70->79 | 0.49565  |
| =  | =         | =      | =      | =      | =       | 71->80 | 0.42294  |
| =  | =         | =      | =      | =      | =       | 78->81 | -0.1571  |
| 17 | Singlet-A | 0.0575 | 4.452  | 278.49 | 35907.9 |        |          |
| =  | =         | =      | =      | =      | =       | 70->80 | 0.13311  |
| =  | =         | =      | =      | =      | =       | 72->80 | 0.65909  |
| 18 | Singlet-A | 0.0145 | 4.5839 | 270.48 | 36971.3 |        |          |
| =  | =         | =      | =      | =      | =       | 70->80 | 0.40463  |
| =  | =         | =      | =      | =      | =       | 71->79 | -0.2024  |
| =  | =         | =      | =      | =      | =       | 71->80 | 0.21755  |
| =  | =         | =      | =      | =      | =       | 72->80 | -0.1341  |
| =  | =         | =      | =      | =      | =       | 77->81 | 0.42258  |
| =  | =         | =      | =      | =      | =       | 78->81 | 0.14021  |
| 19 | Singlet-A | 0.1742 | 4.6548 | 266.36 | 37543.2 |        |          |
| =  | =         | =      | =      | =      | =       | 70->79 | 0.13646  |
| =  | =         | =      | =      | =      | =       | 70->80 | 0.33951  |
| =  | =         | =      | =      | =      | =       | 77->81 | -0.26741 |
| =  | =         | =      | =      | =      | =       | 77->82 | -0.14191 |
| =  | =         | =      | =      | =      | =       | 78->82 | 0.48512  |
| 20 | Singlet-A | 0.1506 | 4.7373 | 261.72 | 38208.8 |        |          |
| =  | =         | =      | =      | =      | =       | 70->79 | -0.13869 |
| =  | =         | =      | =      | =      | =       | 70->80 | -0.12265 |
| =  | =         | =      | =      | =      | =       | 71->80 | 0.33557  |
| =  | =         | =      | =      | =      | =       | 77->81 | -0.22486 |
| =  | =         | =      | =      | =      | =       | 77->82 | 0.44544  |
| =  | =         | =      | =      | =      | =       | 78->81 | 0.20873  |

|   |    |           |        |        |        |         |        |          |
|---|----|-----------|--------|--------|--------|---------|--------|----------|
| = | =  | =         | =      | =      | =      | =       | 78->82 | 0.17615  |
|   | 21 | Singlet-A | 0.0711 | 5.0985 | 243.18 | 41121.8 |        |          |
| = | =  | =         | =      | =      | =      | =       | 70->79 | -0.21054 |
| = | =  | =         | =      | =      | =      | =       | 71->80 | 0.21476  |
| = | =  | =         | =      | =      | =      | =       | 77->81 | -0.18286 |
| = | =  | =         | =      | =      | =      | =       | 77->82 | -0.31979 |
| = | =  | =         | =      | =      | =      | =       | 78->82 | -0.14643 |
| = | =  | =         | =      | =      | =      | =       | 78->83 | 0.43159  |
|   | 22 | Singlet-A | 0.0157 | 5.2321 | 236.97 | 42199.4 |        |          |
| = | =  | =         | =      | =      | =      | =       | 69->79 | 0.25695  |
| = | =  | =         | =      | =      | =      | =       | 70->80 | 0.30477  |
| = | =  | =         | =      | =      | =      | =       | 71->79 | 0.18413  |
| = | =  | =         | =      | =      | =      | =       | 77->81 | -0.2209  |
| = | =  | =         | =      | =      | =      | =       | 77->82 | 0.25801  |
| = | =  | =         | =      | =      | =      | =       | 78->81 | -0.1201  |
| = | =  | =         | =      | =      | =      | =       | 78->82 | -0.28315 |
| = | =  | =         | =      | =      | =      | =       | 78->84 | 0.16715  |
|   | 23 | Singlet-A | 0.0144 | 5.3362 | 232.35 | 43038.5 |        |          |
| = | =  | =         | =      | =      | =      | =       | 69->79 | -0.18502 |
| = | =  | =         | =      | =      | =      | =       | 71->80 | -0.14357 |
| = | =  | =         | =      | =      | =      | =       | 76->81 | 0.40372  |
| = | =  | =         | =      | =      | =      | =       | 76->82 | 0.14382  |
| = | =  | =         | =      | =      | =      | =       | 77->82 | 0.16757  |
| = | =  | =         | =      | =      | =      | =       | 78->83 | 0.41124  |
| = | =  | =         | =      | =      | =      | =       | 78->84 | -0.13586 |
|   | 24 | Singlet-A | 0.0344 | 5.4409 | 227.88 | 43882.7 |        |          |
| = | =  | =         | =      | =      | =      | =       | 69->79 | 0.43058  |
| = | =  | =         | =      | =      | =      | =       | 70->80 | -0.10138 |
| = | =  | =         | =      | =      | =      | =       | 76->81 | 0.26726  |
| = | =  | =         | =      | =      | =      | =       | 77->83 | 0.44534  |
|   | 25 | Singlet-A | 0.0794 | 5.5247 | 224.42 | 44559.3 |        |          |
| = | =  | =         | =      | =      | =      | =       | 69->79 | -0.19764 |
| = | =  | =         | =      | =      | =      | =       | 69->80 | 0.10504  |
| = | =  | =         | =      | =      | =      | =       | 70->79 | -0.15055 |
| = | =  | =         | =      | =      | =      | =       | 71->80 | 0.12977  |
| = | =  | =         | =      | =      | =      | =       | 76->81 | 0.38212  |
| = | =  | =         | =      | =      | =      | =       | 76->82 | 0.22506  |
| = | =  | =         | =      | =      | =      | =       | 77->82 | -0.15718 |
| = | =  | =         | =      | =      | =      | =       | 78->83 | -0.2946  |
| = | =  | =         | =      | =      | =      | =       | 78->84 | 0.10623  |
|   | 26 | Singlet-A | 0.0233 | 5.5798 | 222.2  | 45004.5 |        |          |
| = | =  | =         | =      | =      | =      | =       | 69->79 | 0.11871  |
| = | =  | =         | =      | =      | =      | =       | 70->80 | -0.15359 |

|    |           |        |        |        |         |        |          |
|----|-----------|--------|--------|--------|---------|--------|----------|
| =  | =         | =      | =      | =      | =       | 77->81 | 0.10236  |
| =  | =         | =      | =      | =      | =       | 77->83 | -0.17733 |
| =  | =         | =      | =      | =      | =       | 78->82 | 0.13825  |
| =  | =         | =      | =      | =      | =       | 78->83 | 0.12884  |
| =  | =         | =      | =      | =      | =       | 78->84 | 0.58364  |
| 27 | Singlet-A | 0.0396 | 5.6811 | 218.24 | 45821.1 |        |          |
| =  | =         | =      | =      | =      | =       | 69->79 | -0.18579 |
| =  | =         | =      | =      | =      | =       | 71->81 | -0.10053 |
| =  | =         | =      | =      | =      | =       | 76->81 | -0.20806 |
| =  | =         | =      | =      | =      | =       | 76->82 | 0.3909   |
| =  | =         | =      | =      | =      | =       | 77->83 | 0.34783  |
| =  | =         | =      | =      | =      | =       | 77->84 | -0.26953 |
| =  | =         | =      | =      | =      | =       | 78->84 | 0.1484   |
| 28 | Singlet-A | 0.0277 | 5.7071 | 217.25 | 46029.9 |        |          |
| =  | =         | =      | =      | =      | =       | 69->79 | 0.22389  |
| =  | =         | =      | =      | =      | =       | 69->80 | 0.18405  |
| =  | =         | =      | =      | =      | =       | 70->80 | -0.11573 |
| =  | =         | =      | =      | =      | =       | 76->81 | -0.14102 |
| =  | =         | =      | =      | =      | =       | 76->82 | 0.4759   |
| =  | =         | =      | =      | =      | =       | 77->83 | -0.25221 |
| =  | =         | =      | =      | =      | =       | 78->84 | -0.17666 |
| 29 | Singlet-A | 0.0149 | 5.8514 | 211.89 | 47194.3 |        |          |
| =  | =         | =      | =      | =      | =       | 69->79 | -0.1084  |
| =  | =         | =      | =      | =      | =       | 69->80 | 0.53748  |
| =  | =         | =      | =      | =      | =       | 71->81 | -0.11019 |
| =  | =         | =      | =      | =      | =       | 74->81 | 0.13552  |
| =  | =         | =      | =      | =      | =       | 77->83 | 0.13376  |
| =  | =         | =      | =      | =      | =       | 77->84 | 0.18922  |
| =  | =         | =      | =      | =      | =       | 78->84 | 0.11585  |
| =  | =         | =      | =      | =      | =       | 78->85 | -0.12497 |
| =  | =         | =      | =      | =      | =       | 78->86 | 0.15515  |
| 30 | Singlet-A | 0.0255 | 5.878  | 210.93 | 47409.1 |        |          |
| =  | =         | =      | =      | =      | =       | 69->80 | -0.11193 |
| =  | =         | =      | =      | =      | =       | 73->81 | 0.31166  |
| =  | =         | =      | =      | =      | =       | 75->81 | 0.58582  |
| 31 | Singlet-A | 0.0051 | 5.929  | 209.12 | 47819.4 |        |          |
| =  | =         | =      | =      | =      | =       | 69->80 | -0.18011 |
| =  | =         | =      | =      | =      | =       | 74->81 | 0.53379  |
| =  | =         | =      | =      | =      | =       | 77->84 | 0.31464  |
| =  | =         | =      | =      | =      | =       | 78->85 | 0.20442  |
| 32 | Singlet-A | 0.0022 | 5.9591 | 208.06 | 48063.1 |        |          |
| =  | =         | =      | =      | =      | =       | 73->81 | -0.10729 |
| =  | =         | =      | =      | =      | =       | 74->81 | -0.34523 |

|    |           |        |        |        |         |        |          |
|----|-----------|--------|--------|--------|---------|--------|----------|
| =  | =         | =      | =      | =      | =       | 75->82 | -0.13553 |
| =  | =         | =      | =      | =      | =       | 77->84 | 0.29236  |
| =  | =         | =      | =      | =      | =       | 78->85 | 0.44497  |
| 33 | Singlet-A | 0.0058 | 6.0313 | 205.57 | 48645.2 |        |          |
| =  | =         | =      | =      | =      | =       | 69->80 | 0.15469  |
| =  | =         | =      | =      | =      | =       | 73->81 | 0.17473  |
| =  | =         | =      | =      | =      | =       | 74->81 | 0.11339  |
| =  | =         | =      | =      | =      | =       | 77->84 | -0.32508 |
| =  | =         | =      | =      | =      | =       | 78->85 | 0.45782  |
| =  | =         | =      | =      | =      | =       | 78->86 | 0.22302  |
| 34 | Singlet-A | 0.0039 | 6.182  | 200.56 | 49860.4 |        |          |
| =  | =         | =      | =      | =      | =       | 72->81 | 0.13193  |
| =  | =         | =      | =      | =      | =       | 73->81 | -0.34829 |
| =  | =         | =      | =      | =      | =       | 75->81 | 0.1075   |
| =  | =         | =      | =      | =      | =       | 75->82 | 0.49282  |
| =  | =         | =      | =      | =      | =       | 77->85 | 0.24248  |
| 35 | Singlet-A | 0.0045 | 6.2319 | 198.95 | 50263.9 |        |          |
| =  | =         | =      | =      | =      | =       | 75->82 | -0.22233 |
| =  | =         | =      | =      | =      | =       | 77->85 | 0.62649  |
| =  | =         | =      | =      | =      | =       | 77->86 | 0.11209  |
| 36 | Singlet-A | 0      | 6.2427 | 198.61 | 50349.9 |        |          |
| =  | =         | =      | =      | =      | =       | 67->79 | 0.3749   |
| =  | =         | =      | =      | =      | =       | 68->79 | 0.58473  |
| 37 | Singlet-A | 0.0072 | 6.2509 | 198.35 | 50415.9 |        |          |
| =  | =         | =      | =      | =      | =       | 67->79 | 0.46246  |
| =  | =         | =      | =      | =      | =       | 68->79 | -0.32015 |
| =  | =         | =      | =      | =      | =       | 72->81 | -0.31667 |
| =  | =         | =      | =      | =      | =       | 73->82 | 0.11297  |
| =  | =         | =      | =      | =      | =       | 75->82 | 0.14223  |
| =  | =         | =      | =      | =      | =       | 78->86 | -0.11539 |
| 38 | Singlet-A | 0.0113 | 6.2633 | 197.95 | 50517.8 |        |          |
| =  | =         | =      | =      | =      | =       | 67->79 | 0.34086  |
| =  | =         | =      | =      | =      | =       | 68->79 | -0.19437 |
| =  | =         | =      | =      | =      | =       | 72->81 | 0.27972  |
| =  | =         | =      | =      | =      | =       | 73->81 | -0.16924 |
| =  | =         | =      | =      | =      | =       | 73->82 | -0.24087 |
| =  | =         | =      | =      | =      | =       | 74->82 | -0.18809 |
| =  | =         | =      | =      | =      | =       | 75->81 | 0.11995  |
| =  | =         | =      | =      | =      | =       | 75->82 | -0.21254 |
| =  | =         | =      | =      | =      | =       | 76->83 | -0.19304 |
| =  | =         | =      | =      | =      | =       | 78->86 | 0.12122  |
| 39 | Singlet-A | 0.02   | 6.2885 | 197.16 | 50720.2 |        |          |
| =  | =         | =      | =      | =      | =       | 67->79 | 0.10063  |

|    |           |        |        |       |         |        |          |
|----|-----------|--------|--------|-------|---------|--------|----------|
| =  | =         | =      | =      | =     | =       | 71->81 | -0.247   |
| =  | =         | =      | =      | =     | =       | 72->81 | 0.45053  |
| =  | =         | =      | =      | =     | =       | 72->82 | -0.1302  |
| =  | =         | =      | =      | =     | =       | 73->81 | 0.22558  |
| =  | =         | =      | =      | =     | =       | 73->82 | 0.18674  |
| =  | =         | =      | =      | =     | =       | 74->82 | 0.14828  |
| =  | =         | =      | =      | =     | =       | 75->81 | -0.13752 |
| =  | =         | =      | =      | =     | =       | 75->82 | 0.12092  |
| =  | =         | =      | =      | =     | =       | 78->86 | -0.14612 |
| 40 | Singlet-A | 0.0293 | 6.3162 | 196.3 | 50942.4 |        |          |
| =  | =         | =      | =      | =     | =       | 67->79 | 0.10529  |
| =  | =         | =      | =      | =     | =       | 70->82 | 0.11622  |
| =  | =         | =      | =      | =     | =       | 71->81 | 0.27326  |
| =  | =         | =      | =      | =     | =       | 72->81 | 0.10521  |
| =  | =         | =      | =      | =     | =       | 74->82 | 0.19764  |
| =  | =         | =      | =      | =     | =       | 76->83 | 0.2047   |
| =  | =         | =      | =      | =     | =       | 76->84 | -0.10962 |
| =  | =         | =      | =      | =     | =       | 78->86 | 0.4916   |

### Corrole 5a in DCM

#### Coordinates:

|   |          |          |          |
|---|----------|----------|----------|
| C | 1.60776  | -4.26525 | 0.29858  |
| C | 2.82437  | -3.59102 | 0.36972  |
| C | 2.61407  | -2.24879 | -0.04337 |
| C | 0.63411  | -3.34868 | -0.15475 |
| C | -0.78614 | -3.26326 | -0.20494 |
| C | -2.64161 | -2.11796 | -0.18528 |
| C | -3.00515 | -3.50667 | -0.01428 |
| C | -1.83462 | -4.22428 | -0.0222  |
| C | 3.42533  | -1.08387 | -0.03006 |
| C | 2.85632  | 0.20148  | -0.09227 |
| C | 3.47535  | 1.43237  | -0.44488 |
| C | 2.52532  | 2.42418  | -0.44529 |
| C | 1.26674  | 1.85813  | -0.08698 |
| C | 0.02606  | 2.51404  | -0.01517 |
| C | -1.25059 | 1.90365  | 0.05398  |
| C | -2.51565 | 2.55646  | 0.19488  |
| C | -3.50679 | 1.6038   | 0.16302  |
| C | -2.88892 | 0.32781  | 0.02794  |
| C | -3.45131 | -0.96545 | -0.04868 |

|   |          |          |          |
|---|----------|----------|----------|
| N | 1.29514  | -2.18242 | -0.38574 |
| H | 0.83777  | -1.39288 | -0.81436 |
| N | -1.2916  | -2.02039 | -0.3253  |
| N | -1.53281 | 0.56773  | -0.02617 |
| H | -0.9337  | -0.24254 | -0.21045 |
| N | 1.50117  | 0.5018   | 0.09001  |
| H | 0.93463  | -0.04853 | 0.72302  |
| H | -2.64722 | 3.62294  | 0.30995  |
| H | -4.57184 | 1.77667  | 0.22987  |
| H | -4.00623 | -3.891   | 0.13386  |
| H | -1.71474 | -5.29389 | 0.09908  |
| H | 1.41822  | -5.28709 | 0.59944  |
| H | 3.76103  | -3.98823 | 0.73683  |
| H | 4.51269  | 1.53215  | -0.73359 |
| H | 2.67142  | 3.45736  | -0.72735 |
| C | 4.89054  | -1.23051 | 0.05079  |
| C | 5.55402  | -2.20939 | -0.70668 |
| C | 5.6571   | -0.41203 | 0.89583  |
| C | 6.934    | -2.35992 | -0.62504 |
| H | 4.9785   | -2.84067 | -1.37798 |
| C | 7.03776  | -0.56035 | 0.97204  |
| H | 5.15766  | 0.32973  | 1.5128   |
| C | 7.68245  | -1.535   | 0.21283  |
| H | 7.42785  | -3.1187  | -1.22612 |
| H | 7.61069  | 0.08009  | 1.63727  |
| H | 8.76079  | -1.65247 | 0.27518  |
| C | -4.9193  | -1.11842 | 0.0644   |
| C | -5.62934 | -1.85188 | -0.8977  |
| C | -5.63243 | -0.55475 | 1.13266  |
| C | -7.00812 | -2.01056 | -0.7983  |
| H | -5.09079 | -2.28502 | -1.73615 |
| C | -7.01135 | -0.71335 | 1.23083  |
| H | -5.09376 | -0.00844 | 1.90202  |
| C | -7.70473 | -1.4405  | 0.26532  |
| H | -7.5404  | -2.57642 | -1.55825 |
| H | -7.5443  | -0.2749  | 2.07033  |
| H | -8.78148 | -1.56409 | 0.34278  |
| C | 0.06414  | 4.00177  | -0.06033 |
| C | 0.77579  | 4.72616  | 0.90557  |
| C | -0.59666 | 4.71111  | -1.07283 |
| C | 0.82365  | 6.11671  | 0.86294  |
| H | 1.2865   | 4.18893  | 1.70046  |
| C | -0.5514  | 6.10156  | -1.11459 |



|   |          |         |          |
|---|----------|---------|----------|
| H | -1.13932 | 4.16218 | -1.83782 |
| C | 0.15874  | 6.80929 | -0.14667 |
| H | 1.37659  | 6.66006 | 1.62458  |
| H | -1.06566 | 6.63292 | -1.91101 |
| H | 0.1947   | 7.8948  | -0.18009 |

### Frequencies:

|             |    |         |         |         |
|-------------|----|---------|---------|---------|
|             |    | 1       | 2       | 3       |
| Frequencies | -- | 20.9577 | 33.9247 | 38.9207 |

### TDDFT:

| Order | Symm      | f      | Energy_eV | Energy_nm | Energy_cm-1 | Transition | Coef     |
|-------|-----------|--------|-----------|-----------|-------------|------------|----------|
| 1     | Singlet-A | 0.2262 | 1.9983    | 620.46    | 16117.1     |            |          |
| =     | =         | =      | =         | =         | =           | 137->139   | 0.14659  |
| =     | =         | =      | =         | =         | =           | 137->140   | -0.28301 |
| =     | =         | =      | =         | =         | =           | 138->139   | 0.61008  |
| =     | =         | =      | =         | =         | =           | 138->140   | 0.15467  |
| 2     | Singlet-A | 0.0511 | 2.175     | 570.05    | 17542.3     |            |          |
| =     | =         | =      | =         | =         | =           | 137->139   | 0.43515  |
| =     | =         | =      | =         | =         | =           | 138->139   | -0.19888 |
| =     | =         | =      | =         | =         | =           | 138->140   | 0.50735  |
| 3     | Singlet-A | 0.7392 | 2.7478    | 451.22    | 22162.1     |            |          |
| =     | =         | =      | =         | =         | =           | 136->139   | -0.25868 |
| =     | =         | =      | =         | =         | =           | 137->139   | 0.47563  |
| =     | =         | =      | =         | =         | =           | 137->140   | -0.11339 |
| =     | =         | =      | =         | =         | =           | 138->140   | -0.40068 |
| 4     | Singlet-A | 1.0177 | 2.8287    | 438.3     | 22815.4     |            |          |
| =     | =         | =      | =         | =         | =           | 136->139   | -0.21694 |
| =     | =         | =      | =         | =         | =           | 137->140   | 0.5921   |
| =     | =         | =      | =         | =         | =           | 138->139   | 0.26259  |
| 5     | Singlet-A | 0.3886 | 2.991     | 414.52    | 24124.3     |            |          |
| =     | =         | =      | =         | =         | =           | 136->139   | 0.60239  |
| =     | =         | =      | =         | =         | =           | 136->140   | -0.14285 |
| =     | =         | =      | =         | =         | =           | 137->139   | 0.19021  |
| =     | =         | =      | =         | =         | =           | 137->140   | 0.13584  |
| =     | =         | =      | =         | =         | =           | 138->140   | -0.18682 |
| 6     | Singlet-A | 0.0734 | 3.2657    | 379.66    | 26339.4     |            |          |
| =     | =         | =      | =         | =         | =           | 135->139   | 0.12807  |
| =     | =         | =      | =         | =         | =           | 136->139   | 0.11443  |

|   |    |           |        |        |        |         |          |          |
|---|----|-----------|--------|--------|--------|---------|----------|----------|
| = | =  | =         | =      | =      | =      | =       | 136->140 | 0.65747  |
|   | 7  | Singlet-A | 0.0585 | 3.3325 | 372.04 | 26878.8 |          |          |
| = | =  | =         | =      | =      | =      | =       | 135->139 | 0.40558  |
| = | =  | =         | =      | =      | =      | =       | 138->141 | 0.55077  |
|   | 8  | Singlet-A | 0.0199 | 3.3796 | 366.86 | 27258.4 |          |          |
| = | =  | =         | =      | =      | =      | =       | 134->139 | -0.24035 |
| = | =  | =         | =      | =      | =      | =       | 135->139 | 0.22931  |
| = | =  | =         | =      | =      | =      | =       | 138->141 | -0.17545 |
| = | =  | =         | =      | =      | =      | =       | 138->142 | 0.55744  |
|   | 9  | Singlet-A | 0.0417 | 3.3888 | 365.86 | 27332.9 |          |          |
| = | =  | =         | =      | =      | =      | =       | 130->139 | 0.13114  |
| = | =  | =         | =      | =      | =      | =       | 131->139 | -0.10271 |
| = | =  | =         | =      | =      | =      | =       | 134->139 | -0.20226 |
| = | =  | =         | =      | =      | =      | =       | 135->139 | 0.38015  |
| = | =  | =         | =      | =      | =      | =       | 138->141 | -0.2436  |
| = | =  | =         | =      | =      | =      | =       | 138->142 | -0.32962 |
| = | =  | =         | =      | =      | =      | =       | 138->143 | 0.17419  |
| = | =  | =         | =      | =      | =      | =       | 138->144 | -0.20842 |
|   | 10 | Singlet-A | 0.0028 | 3.4144 | 363.12 | 27539.1 |          |          |
| = | =  | =         | =      | =      | =      | =       | 133->139 | 0.16113  |
| = | =  | =         | =      | =      | =      | =       | 138->142 | 0.10311  |
| = | =  | =         | =      | =      | =      | =       | 138->143 | 0.56852  |
| = | =  | =         | =      | =      | =      | =       | 138->144 | 0.12936  |
| = | =  | =         | =      | =      | =      | =       | 138->145 | 0.29502  |
|   | 11 | Singlet-A | 0.0135 | 3.4224 | 362.28 | 27603   |          |          |
| = | =  | =         | =      | =      | =      | =       | 133->139 | -0.16194 |
| = | =  | =         | =      | =      | =      | =       | 134->139 | -0.32038 |
| = | =  | =         | =      | =      | =      | =       | 138->143 | 0.13445  |
| = | =  | =         | =      | =      | =      | =       | 138->144 | 0.49654  |
| = | =  | =         | =      | =      | =      | =       | 138->145 | -0.26397 |
|   | 12 | Singlet-A | 0.0031 | 3.4358 | 360.86 | 27711.6 |          |          |
| = | =  | =         | =      | =      | =      | =       | 130->139 | 0.10107  |
| = | =  | =         | =      | =      | =      | =       | 132->139 | 0.17833  |
| = | =  | =         | =      | =      | =      | =       | 134->139 | 0.43032  |
| = | =  | =         | =      | =      | =      | =       | 135->139 | 0.23733  |
| = | =  | =         | =      | =      | =      | =       | 138->141 | -0.232   |
| = | =  | =         | =      | =      | =      | =       | 138->144 | 0.30207  |
| = | =  | =         | =      | =      | =      | =       | 138->145 | -0.15436 |
|   | 13 | Singlet-A | 0.0036 | 3.4587 | 358.47 | 27896.3 |          |          |
| = | =  | =         | =      | =      | =      | =       | 128->139 | 0.13304  |
| = | =  | =         | =      | =      | =      | =       | 132->139 | 0.15065  |
| = | =  | =         | =      | =      | =      | =       | 133->139 | 0.56329  |
| = | =  | =         | =      | =      | =      | =       | 134->139 | -0.16544 |

|   |    |           |        |        |        |         |          |          |
|---|----|-----------|--------|--------|--------|---------|----------|----------|
| = | =  | =         | =      | =      | =      | =       | 138->145 | -0.2791  |
|   | 14 | Singlet-A | 0.0172 | 3.478  | 356.48 | 28052.1 |          |          |
| = | =  | =         | =      | =      | =      | =       | 131->139 | 0.43835  |
| = | =  | =         | =      | =      | =      | =       | 132->139 | 0.22339  |
| = | =  | =         | =      | =      | =      | =       | 133->139 | -0.11358 |
| = | =  | =         | =      | =      | =      | =       | 138->142 | 0.10879  |
| = | =  | =         | =      | =      | =      | =       | 138->143 | 0.19025  |
| = | =  | =         | =      | =      | =      | =       | 138->144 | -0.1836  |
| = | =  | =         | =      | =      | =      | =       | 138->145 | -0.22868 |
| = | =  | =         | =      | =      | =      | =       | 138->146 | -0.28867 |
|   | 15 | Singlet-A | 0.0076 | 3.4934 | 354.91 | 28176.2 |          |          |
| = | =  | =         | =      | =      | =      | =       | 128->139 | -0.13703 |
| = | =  | =         | =      | =      | =      | =       | 130->139 | 0.19586  |
| = | =  | =         | =      | =      | =      | =       | 131->139 | 0.21422  |
| = | =  | =         | =      | =      | =      | =       | 133->139 | -0.10452 |
| = | =  | =         | =      | =      | =      | =       | 135->140 | 0.15374  |
| = | =  | =         | =      | =      | =      | =       | 138->144 | -0.12972 |
| = | =  | =         | =      | =      | =      | =       | 138->146 | 0.57115  |
|   | 16 | Singlet-A | 0.026  | 3.503  | 353.93 | 28254.2 |          |          |
| = | =  | =         | =      | =      | =      | =       | 128->139 | 0.11775  |
| = | =  | =         | =      | =      | =      | =       | 130->139 | 0.39062  |
| = | =  | =         | =      | =      | =      | =       | 132->139 | 0.38924  |
| = | =  | =         | =      | =      | =      | =       | 134->139 | -0.11354 |
| = | =  | =         | =      | =      | =      | =       | 138->142 | -0.12198 |
| = | =  | =         | =      | =      | =      | =       | 138->145 | 0.31375  |
|   | 17 | Singlet-A | 0.0165 | 3.5259 | 351.64 | 28438.2 |          |          |
| = | =  | =         | =      | =      | =      | =       | 127->139 | -0.15743 |
| = | =  | =         | =      | =      | =      | =       | 130->139 | 0.10818  |
| = | =  | =         | =      | =      | =      | =       | 131->139 | 0.40405  |
| = | =  | =         | =      | =      | =      | =       | 132->139 | -0.34183 |
| = | =  | =         | =      | =      | =      | =       | 133->139 | 0.23509  |
| = | =  | =         | =      | =      | =      | =       | 138->143 | -0.13003 |
| = | =  | =         | =      | =      | =      | =       | 138->144 | 0.12146  |
| = | =  | =         | =      | =      | =      | =       | 138->145 | 0.19162  |
|   | 18 | Singlet-A | 0.0066 | 3.5726 | 347.04 | 28815.1 |          |          |
| = | =  | =         | =      | =      | =      | =       | 128->139 | -0.11447 |
| = | =  | =         | =      | =      | =      | =       | 129->139 | 0.60464  |
| = | =  | =         | =      | =      | =      | =       | 130->139 | -0.22089 |
| = | =  | =         | =      | =      | =      | =       | 132->139 | 0.13702  |
|   | 19 | Singlet-A | 0.001  | 3.6452 | 340.13 | 29400.5 |          |          |
| = | =  | =         | =      | =      | =      | =       | 128->139 | 0.31312  |
| = | =  | =         | =      | =      | =      | =       | 129->139 | -0.13036 |
| = | =  | =         | =      | =      | =      | =       | 130->139 | -0.27373 |

|    |           |        |        |        |         |          |          |
|----|-----------|--------|--------|--------|---------|----------|----------|
| =  | =         | =      | =      | =      | =       | 131->139 | 0.13927  |
| =  | =         | =      | =      | =      | =       | 134->139 | -0.12293 |
| =  | =         | =      | =      | =      | =       | 135->140 | 0.36723  |
| =  | =         | =      | =      | =      | =       | 137->141 | -0.21637 |
| =  | =         | =      | =      | =      | =       | 138->145 | 0.10904  |
| =  | =         | =      | =      | =      | =       | 138->147 | -0.10611 |
| 20 | Singlet-A | 0.0157 | 3.6498 | 339.7  | 29437.7 |          |          |
| =  | =         | =      | =      | =      | =       | 128->139 | 0.5374   |
| =  | =         | =      | =      | =      | =       | 129->139 | 0.19238  |
| =  | =         | =      | =      | =      | =       | 130->139 | 0.11015  |
| =  | =         | =      | =      | =      | =       | 132->139 | -0.168   |
| =  | =         | =      | =      | =      | =       | 133->139 | -0.10264 |
| =  | =         | =      | =      | =      | =       | 134->139 | 0.13029  |
| =  | =         | =      | =      | =      | =       | 135->140 | -0.16524 |
| 21 | Singlet-A | 0.0644 | 3.6944 | 335.6  | 29797.4 |          |          |
| =  | =         | =      | =      | =      | =       | 128->139 | 0.13147  |
| =  | =         | =      | =      | =      | =       | 135->140 | 0.14502  |
| =  | =         | =      | =      | =      | =       | 137->141 | 0.63874  |
| 22 | Singlet-A | 0.0621 | 3.7156 | 333.68 | 29968.8 |          |          |
| =  | =         | =      | =      | =      | =       | 127->139 | -0.18599 |
| =  | =         | =      | =      | =      | =       | 130->139 | 0.21367  |
| =  | =         | =      | =      | =      | =       | 131->139 | -0.15438 |
| =  | =         | =      | =      | =      | =       | 135->140 | 0.42096  |
| =  | =         | =      | =      | =      | =       | 137->142 | 0.16942  |
| =  | =         | =      | =      | =      | =       | 137->143 | 0.1695   |
| =  | =         | =      | =      | =      | =       | 137->144 | -0.15921 |
| =  | =         | =      | =      | =      | =       | 137->145 | -0.19939 |
| =  | =         | =      | =      | =      | =       | 138->146 | -0.14113 |
| 23 | Singlet-A | 0.0113 | 3.7307 | 332.33 | 30090.6 |          |          |
| =  | =         | =      | =      | =      | =       | 137->142 | 0.64753  |
| =  | =         | =      | =      | =      | =       | 137->143 | -0.19436 |
| 24 | Singlet-A | 0.0018 | 3.745  | 331.07 | 30205.1 |          |          |
| =  | =         | =      | =      | =      | =       | 127->139 | 0.58033  |
| =  | =         | =      | =      | =      | =       | 132->139 | -0.12167 |
| =  | =         | =      | =      | =      | =       | 133->140 | 0.20491  |
| =  | =         | =      | =      | =      | =       | 134->140 | -0.15214 |
| =  | =         | =      | =      | =      | =       | 137->143 | 0.17115  |
| 25 | Singlet-A | 0.0202 | 3.7699 | 328.88 | 30406.2 |          |          |
| =  | =         | =      | =      | =      | =       | 127->139 | -0.10583 |
| =  | =         | =      | =      | =      | =       | 137->143 | 0.40004  |
| =  | =         | =      | =      | =      | =       | 137->144 | 0.52404  |
| =  | =         | =      | =      | =      | =       | 137->146 | 0.13393  |
| 26 | Singlet-A | 0.0164 | 3.7803 | 327.98 | 30489.7 |          |          |

|    |           |        |        |        |         |          |          |
|----|-----------|--------|--------|--------|---------|----------|----------|
| =  | =         | =      | =      | =      | =       | 130->140 | -0.22972 |
| =  | =         | =      | =      | =      | =       | 133->140 | 0.10282  |
| =  | =         | =      | =      | =      | =       | 134->140 | 0.34086  |
| =  | =         | =      | =      | =      | =       | 137->143 | 0.35223  |
| =  | =         | =      | =      | =      | =       | 137->144 | -0.18182 |
| =  | =         | =      | =      | =      | =       | 137->145 | 0.33526  |
| 27 | Singlet-A | 0.0623 | 3.7968 | 326.55 | 30623.2 |          |          |
| =  | =         | =      | =      | =      | =       | 127->139 | 0.20247  |
| =  | =         | =      | =      | =      | =       | 128->140 | -0.11827 |
| =  | =         | =      | =      | =      | =       | 133->140 | -0.31072 |
| =  | =         | =      | =      | =      | =       | 134->140 | 0.44726  |
| =  | =         | =      | =      | =      | =       | 137->144 | 0.13634  |
| =  | =         | =      | =      | =      | =       | 137->145 | -0.26265 |
| =  | =         | =      | =      | =      | =       | 137->146 | -0.10766 |
| 28 | Singlet-A | 0.0122 | 3.81   | 325.41 | 30730.5 |          |          |
| =  | =         | =      | =      | =      | =       | 128->140 | 0.10021  |
| =  | =         | =      | =      | =      | =       | 132->140 | -0.19015 |
| =  | =         | =      | =      | =      | =       | 133->140 | 0.48173  |
| =  | =         | =      | =      | =      | =       | 134->140 | 0.18543  |
| =  | =         | =      | =      | =      | =       | 137->143 | -0.10879 |
| =  | =         | =      | =      | =      | =       | 137->144 | 0.22719  |
| =  | =         | =      | =      | =      | =       | 137->145 | -0.21538 |
| =  | =         | =      | =      | =      | =       | 137->146 | -0.19205 |
| 29 | Singlet-A | 0.0083 | 3.8208 | 324.5  | 30816.6 |          |          |
| =  | =         | =      | =      | =      | =       | 128->140 | 0.17792  |
| =  | =         | =      | =      | =      | =       | 130->140 | 0.1051   |
| =  | =         | =      | =      | =      | =       | 131->140 | -0.19816 |
| =  | =         | =      | =      | =      | =       | 132->140 | 0.57473  |
| =  | =         | =      | =      | =      | =       | 133->140 | 0.16242  |
| =  | =         | =      | =      | =      | =       | 137->144 | 0.13532  |
| 30 | Singlet-A | 0.0269 | 3.8262 | 324.04 | 30860.4 |          |          |
| =  | =         | =      | =      | =      | =       | 130->140 | 0.21285  |
| =  | =         | =      | =      | =      | =       | 131->140 | 0.55674  |
| =  | =         | =      | =      | =      | =       | 132->140 | 0.13398  |
| =  | =         | =      | =      | =      | =       | 137->143 | 0.10115  |
| =  | =         | =      | =      | =      | =       | 137->144 | -0.11869 |
| =  | =         | =      | =      | =      | =       | 137->146 | -0.26718 |

### Corrole 5a in DMF

**Coordinates:**

|   |          |          |          |
|---|----------|----------|----------|
| C | 1.60764  | -4.26642 | 0.29837  |
| C | 2.82436  | -3.59228 | 0.36899  |
| C | 2.61362  | -2.24928 | -0.04204 |
| C | 0.63357  | -3.3489  | -0.15273 |
| C | -0.78684 | -3.26383 | -0.20251 |
| C | -2.6428  | -2.11832 | -0.18362 |
| C | -3.00608 | -3.5069  | -0.01165 |
| C | -1.83511 | -4.2247  | -0.01885 |
| C | 3.42522  | -1.08457 | -0.02941 |
| C | 2.85643  | 0.20099  | -0.09212 |
| C | 3.47536  | 1.43105  | -0.44766 |
| C | 2.52541  | 2.42306  | -0.44839 |
| C | 1.26739  | 1.85762  | -0.08722 |
| C | 0.02666  | 2.51397  | -0.01518 |
| C | -1.25003 | 1.90378  | 0.05383  |
| C | -2.51535 | 2.55702  | 0.19272  |
| C | -3.50674 | 1.60471  | 0.16069  |
| C | -2.88921 | 0.32806  | 0.02737  |
| C | -3.45237 | -0.96491 | -0.04841 |
| N | 1.29432  | -2.18239 | -0.38288 |
| H | 0.83652  | -1.39124 | -0.80812 |
| N | -1.29273 | -2.02085 | -0.32369 |
| N | -1.53277 | 0.56781  | -0.02583 |
| H | -0.93272 | -0.24236 | -0.20657 |
| N | 1.50151  | 0.50158  | 0.09166  |
| H | 0.93802  | -0.04531 | 0.73049  |
| H | -2.64744 | 3.6236   | 0.30618  |
| H | -4.57165 | 1.77873  | 0.22704  |
| H | -4.00699 | -3.89196 | 0.13596  |
| H | -1.71497 | -5.29416 | 0.1036   |
| H | 1.41845  | -5.28903 | 0.59686  |
| H | 3.76146  | -3.99086 | 0.73349  |
| H | 4.51234  | 1.53096  | -0.73761 |
| H | 2.672    | 3.45573  | -0.73201 |
| C | 4.89056  | -1.23133 | 0.05053  |
| C | 5.55349  | -2.21157 | -0.70591 |
| C | 5.65765  | -0.41116 | 0.89364  |
| C | 6.93364  | -2.36191 | -0.62502 |
| H | 4.97793  | -2.84431 | -1.37578 |
| C | 7.03848  | -0.55934 | 0.9691   |
| H | 5.15904  | 0.33195  | 1.50964  |
| C | 7.68266  | -1.53543 | 0.21104  |
| H | 7.42706  | -3.12178 | -1.22502 |

|   |          |          |          |
|---|----------|----------|----------|
| H | 7.61186  | 0.08244  | 1.63259  |
| H | 8.76102  | -1.65274 | 0.27283  |
| C | -4.92057 | -1.1173  | 0.06377  |
| C | -5.62977 | -1.85476 | -0.89615 |
| C | -5.63502 | -0.54924 | 1.12904  |
| C | -7.00875 | -2.01309 | -0.79763 |
| H | -5.09084 | -2.29174 | -1.73239 |
| C | -7.01418 | -0.70734 | 1.22629  |
| H | -5.09782 | 0.00061  | 1.8969   |
| C | -7.7066  | -1.43854 | 0.26295  |
| H | -7.54012 | -2.58217 | -1.55577 |
| H | -7.54798 | -0.26513 | 2.06323  |
| H | -8.78341 | -1.56174 | 0.33971  |
| C | 0.06539  | 4.0018   | -0.05997 |
| C | 0.77904  | 4.72512  | 0.90545  |
| C | -0.59639 | 4.7122   | -1.07123 |
| C | 0.82773  | 6.11576  | 0.86355  |
| H | 1.29086  | 4.18738  | 1.69928  |
| C | -0.55024 | 6.10275  | -1.11228 |
| H | -1.14068 | 4.16455  | -1.83601 |
| C | 0.1618   | 6.80945  | -0.14482 |
| H | 1.38232  | 6.65823  | 1.62459  |
| H | -1.06529 | 6.63492  | -1.90761 |
| H | 0.1985   | 7.89492  | -0.17766 |

### Frequencies:

|             |    |         |         |         |
|-------------|----|---------|---------|---------|
|             |    | 1       | 2       | 3       |
| Frequencies | -- | 20.8044 | 33.8429 | 38.7193 |

### TDDFT:

| Order | Symm      | f      | Energy_eV | Energy_nm | Energy_cm-1 | Transition | Coef     |
|-------|-----------|--------|-----------|-----------|-------------|------------|----------|
| 1     | Singlet-A | 0.2318 | 1.9959    | 621.2     | 16097.9     |            |          |
| =     | =         | =      | =         | =         | =           | 137->139   | 0.14023  |
| =     | =         | =      | =         | =         | =           | 137->140   | -0.28279 |
| =     | =         | =      | =         | =         | =           | 138->139   | 0.61329  |
| =     | =         | =      | =         | =         | =           | 138->140   | 0.14848  |
| 2     | Singlet-A | 0.049  | 2.1751    | 570.03    | 17542.9     |            |          |
| =     | =         | =      | =         | =         | =           | 137->139   | 0.43618  |
| =     | =         | =      | =         | =         | =           | 138->139   | -0.19085 |

|   |    |           |        |        |        |          |          |
|---|----|-----------|--------|--------|--------|----------|----------|
| = | =  | =         | =      | =      | =      | 138->140 | 0.51004  |
|   | 3  | Singlet-A | 0.7423 | 2.7483 | 451.12 | 22167.1  |          |
| = | =  | =         | =      | =      | =      | 136->139 | -0.25439 |
| = | =  | =         | =      | =      | =      | 137->139 | 0.47883  |
| = | =  | =         | =      | =      | =      | 137->140 | -0.10969 |
| = | =  | =         | =      | =      | =      | 138->140 | -0.40162 |
|   | 4  | Singlet-A | 1.0406 | 2.8287 | 438.3  | 22815.4  |          |
| = | =  | =         | =      | =      | =      | 136->139 | -0.20219 |
| = | =  | =         | =      | =      | =      | 137->140 | 0.59616  |
| = | =  | =         | =      | =      | =      | 138->139 | 0.26409  |
|   | 5  | Singlet-A | 0.3692 | 2.9972 | 413.66 | 24174.4  |          |
| = | =  | =         | =      | =      | =      | 136->139 | 0.6096   |
| = | =  | =         | =      | =      | =      | 136->140 | -0.13938 |
| = | =  | =         | =      | =      | =      | 137->139 | 0.18472  |
| = | =  | =         | =      | =      | =      | 137->140 | 0.12495  |
| = | =  | =         | =      | =      | =      | 138->140 | -0.18291 |
|   | 6  | Singlet-A | 0.0702 | 3.2728 | 378.83 | 26397.1  |          |
| = | =  | =         | =      | =      | =      | 135->139 | 0.14157  |
| = | =  | =         | =      | =      | =      | 136->139 | 0.11252  |
| = | =  | =         | =      | =      | =      | 136->140 | 0.65508  |
|   | 7  | Singlet-A | 0.0677 | 3.3377 | 371.47 | 26920.1  |          |
| = | =  | =         | =      | =      | =      | 135->139 | 0.45103  |
| = | =  | =         | =      | =      | =      | 136->140 | -0.10019 |
| = | =  | =         | =      | =      | =      | 138->141 | 0.50687  |
|   | 8  | Singlet-A | 0.0433 | 3.383  | 366.49 | 27285.9  |          |
| = | =  | =         | =      | =      | =      | 131->139 | 0.14609  |
| = | =  | =         | =      | =      | =      | 134->139 | 0.39384  |
| = | =  | =         | =      | =      | =      | 135->139 | -0.32761 |
| = | =  | =         | =      | =      | =      | 138->141 | 0.27987  |
| = | =  | =         | =      | =      | =      | 138->142 | -0.30036 |
|   | 9  | Singlet-A | 0.0111 | 3.3975 | 364.92 | 27403.3  |          |
| = | =  | =         | =      | =      | =      | 130->139 | -0.11424 |
| = | =  | =         | =      | =      | =      | 132->139 | 0.12483  |
| = | =  | =         | =      | =      | =      | 135->139 | -0.1899  |
| = | =  | =         | =      | =      | =      | 138->141 | 0.12361  |
| = | =  | =         | =      | =      | =      | 138->142 | 0.55601  |
| = | =  | =         | =      | =      | =      | 138->143 | -0.23705 |
| = | =  | =         | =      | =      | =      | 138->145 | 0.11223  |
|   | 10 | Singlet-A | 0.0113 | 3.4142 | 363.15 | 27536.8  |          |
| = | =  | =         | =      | =      | =      | 133->139 | 0.23768  |
| = | =  | =         | =      | =      | =      | 134->139 | 0.33923  |
| = | =  | =         | =      | =      | =      | 138->141 | -0.1789  |
| = | =  | =         | =      | =      | =      | 138->142 | 0.10817  |



|    |           |        |        |        |         |          |          |
|----|-----------|--------|--------|--------|---------|----------|----------|
| =  | =         | =      | =      | =      | =       | 138->143 | 0.39488  |
| =  | =         | =      | =      | =      | =       | 138->145 | 0.29153  |
| 11 | Singlet-A | 0.0086 | 3.4267 | 361.82 | 27638.1 |          |          |
| =  | =         | =      | =      | =      | =       | 132->139 | -0.14505 |
| =  | =         | =      | =      | =      | =       | 134->139 | -0.31482 |
| =  | =         | =      | =      | =      | =       | 135->139 | -0.17528 |
| =  | =         | =      | =      | =      | =       | 135->140 | -0.10956 |
| =  | =         | =      | =      | =      | =       | 138->141 | 0.17823  |
| =  | =         | =      | =      | =      | =       | 138->143 | 0.39867  |
| =  | =         | =      | =      | =      | =       | 138->144 | 0.31731  |
| =  | =         | =      | =      | =      | =       | 138->145 | 0.1177   |
| 12 | Singlet-A | 0.0012 | 3.4348 | 360.96 | 27703.9 |          |          |
| =  | =         | =      | =      | =      | =       | 130->139 | 0.1483   |
| =  | =         | =      | =      | =      | =       | 132->139 | 0.1323   |
| =  | =         | =      | =      | =      | =       | 134->139 | 0.139    |
| =  | =         | =      | =      | =      | =       | 135->139 | 0.14517  |
| =  | =         | =      | =      | =      | =       | 138->141 | -0.1775  |
| =  | =         | =      | =      | =      | =       | 138->144 | 0.55395  |
| =  | =         | =      | =      | =      | =       | 138->145 | -0.21974 |
| 13 | Singlet-A | 0.0038 | 3.4524 | 359.13 | 27845.1 |          |          |
| =  | =         | =      | =      | =      | =       | 128->139 | 0.12868  |
| =  | =         | =      | =      | =      | =       | 132->139 | 0.12351  |
| =  | =         | =      | =      | =      | =       | 133->139 | 0.57078  |
| =  | =         | =      | =      | =      | =       | 134->139 | -0.19859 |
| =  | =         | =      | =      | =      | =       | 135->139 | -0.11024 |
| =  | =         | =      | =      | =      | =       | 138->144 | -0.10372 |
| =  | =         | =      | =      | =      | =       | 138->145 | -0.21782 |
| 14 | Singlet-A | 0.0178 | 3.4806 | 356.21 | 28073.3 |          |          |
| =  | =         | =      | =      | =      | =       | 130->139 | 0.14482  |
| =  | =         | =      | =      | =      | =       | 131->139 | 0.49873  |
| =  | =         | =      | =      | =      | =       | 132->139 | 0.19124  |
| =  | =         | =      | =      | =      | =       | 138->142 | 0.11442  |
| =  | =         | =      | =      | =      | =       | 138->143 | 0.20874  |
| =  | =         | =      | =      | =      | =       | 138->144 | -0.1175  |
| =  | =         | =      | =      | =      | =       | 138->145 | -0.20257 |
| =  | =         | =      | =      | =      | =       | 138->146 | 0.23418  |
| 15 | Singlet-A | 0.0178 | 3.4929 | 354.96 | 28172.2 |          |          |
| =  | =         | =      | =      | =      | =       | 128->139 | 0.15208  |
| =  | =         | =      | =      | =      | =       | 131->139 | -0.12269 |
| =  | =         | =      | =      | =      | =       | 132->139 | 0.24948  |
| =  | =         | =      | =      | =      | =       | 135->140 | -0.15506 |
| =  | =         | =      | =      | =      | =       | 138->142 | -0.10346 |
| =  | =         | =      | =      | =      | =       | 138->144 | 0.11193  |

|    |           |        |        |        |         |          |          |
|----|-----------|--------|--------|--------|---------|----------|----------|
| =  | =         | =      | =      | =      | =       | 138->145 | 0.24575  |
| =  | =         | =      | =      | =      | =       | 138->146 | 0.51465  |
| 16 | Singlet-A | 0.0117 | 3.4988 | 354.36 | 28219.9 |          |          |
| =  | =         | =      | =      | =      | =       | 129->139 | 0.12048  |
| =  | =         | =      | =      | =      | =       | 130->139 | 0.39352  |
| =  | =         | =      | =      | =      | =       | 132->139 | 0.34741  |
| =  | =         | =      | =      | =      | =       | 138->145 | 0.24077  |
| =  | =         | =      | =      | =      | =       | 138->146 | -0.3105  |
| 17 | Singlet-A | 0.0165 | 3.5258 | 351.65 | 28437.4 |          |          |
| =  | =         | =      | =      | =      | =       | 127->139 | 0.15327  |
| =  | =         | =      | =      | =      | =       | 129->139 | -0.13587 |
| =  | =         | =      | =      | =      | =       | 130->139 | -0.18757 |
| =  | =         | =      | =      | =      | =       | 131->139 | -0.32636 |
| =  | =         | =      | =      | =      | =       | 132->139 | 0.33685  |
| =  | =         | =      | =      | =      | =       | 133->139 | -0.21392 |
| =  | =         | =      | =      | =      | =       | 138->143 | 0.17646  |
| =  | =         | =      | =      | =      | =       | 138->145 | -0.2783  |
| 18 | Singlet-A | 0.0083 | 3.5582 | 348.44 | 28699.3 |          |          |
| =  | =         | =      | =      | =      | =       | 129->139 | 0.56612  |
| =  | =         | =      | =      | =      | =       | 130->139 | -0.29837 |
| =  | =         | =      | =      | =      | =       | 132->139 | 0.13765  |
| =  | =         | =      | =      | =      | =       | 138->142 | -0.10357 |
| 19 | Singlet-A | 0.0028 | 3.6417 | 340.46 | 29372   |          |          |
| =  | =         | =      | =      | =      | =       | 128->139 | 0.15152  |
| =  | =         | =      | =      | =      | =       | 129->139 | -0.2207  |
| =  | =         | =      | =      | =      | =       | 130->139 | -0.24827 |
| =  | =         | =      | =      | =      | =       | 131->139 | 0.17023  |
| =  | =         | =      | =      | =      | =       | 132->139 | 0.112    |
| =  | =         | =      | =      | =      | =       | 134->139 | -0.15218 |
| =  | =         | =      | =      | =      | =       | 135->140 | 0.41462  |
| =  | =         | =      | =      | =      | =       | 137->141 | -0.1329  |
| =  | =         | =      | =      | =      | =       | 138->145 | 0.14259  |
| =  | =         | =      | =      | =      | =       | 138->147 | -0.11693 |
| 20 | Singlet-A | 0.0159 | 3.6512 | 339.57 | 29449   |          |          |
| =  | =         | =      | =      | =      | =       | 128->139 | 0.61978  |
| =  | =         | =      | =      | =      | =       | 129->139 | 0.1309   |
| =  | =         | =      | =      | =      | =       | 132->139 | -0.10477 |
| =  | =         | =      | =      | =      | =       | 133->139 | -0.12933 |
| =  | =         | =      | =      | =      | =       | 137->141 | -0.10472 |
| 21 | Singlet-A | 0.0437 | 3.7075 | 334.41 | 29903.4 |          |          |
| =  | =         | =      | =      | =      | =       | 135->140 | 0.2001   |
| =  | =         | =      | =      | =      | =       | 137->141 | 0.62598  |
| 22 | Singlet-A | 0.0751 | 3.7159 | 333.66 | 29970.6 |          |          |

|   |    |           |        |        |        |          |          |
|---|----|-----------|--------|--------|--------|----------|----------|
| = | =  | =         | =      | =      | =      | 127->139 | -0.21871 |
| = | =  | =         | =      | =      | =      | 128->139 | -0.11711 |
| = | =  | =         | =      | =      | =      | 130->139 | 0.18951  |
| = | =  | =         | =      | =      | =      | 131->139 | -0.1846  |
| = | =  | =         | =      | =      | =      | 135->140 | 0.3806   |
| = | =  | =         | =      | =      | =      | 137->141 | -0.19897 |
| = | =  | =         | =      | =      | =      | 137->142 | 0.13228  |
| = | =  | =         | =      | =      | =      | 137->143 | 0.16967  |
| = | =  | =         | =      | =      | =      | 137->145 | -0.20684 |
| = | =  | =         | =      | =      | =      | 138->146 | 0.14126  |
|   | 23 | Singlet-A | 0.0008 | 3.7405 | 331.46 | 30169.6  |          |
| = | =  | =         | =      | =      | =      | 127->139 | 0.57023  |
| = | =  | =         | =      | =      | =      | 129->139 | 0.10665  |
| = | =  | =         | =      | =      | =      | 132->139 | -0.1282  |
| = | =  | =         | =      | =      | =      | 133->140 | 0.21352  |
| = | =  | =         | =      | =      | =      | 134->140 | -0.13875 |
| = | =  | =         | =      | =      | =      | 135->140 | 0.11323  |
| = | =  | =         | =      | =      | =      | 137->142 | 0.12317  |
| = | =  | =         | =      | =      | =      | 137->143 | 0.10244  |
|   | 24 | Singlet-A | 0.0158 | 3.7477 | 330.83 | 30227    |          |
| = | =  | =         | =      | =      | =      | 137->142 | 0.63669  |
| = | =  | =         | =      | =      | =      | 137->143 | -0.22824 |
|   | 25 | Singlet-A | 0.0071 | 3.7788 | 328.11 | 30477.6  |          |
| = | =  | =         | =      | =      | =      | 130->140 | -0.20171 |
| = | =  | =         | =      | =      | =      | 133->140 | 0.10386  |
| = | =  | =         | =      | =      | =      | 134->140 | 0.43999  |
| = | =  | =         | =      | =      | =      | 137->143 | 0.24203  |
| = | =  | =         | =      | =      | =      | 137->144 | -0.27636 |
| = | =  | =         | =      | =      | =      | 137->145 | 0.21264  |
| = | =  | =         | =      | =      | =      | 137->146 | 0.11473  |
|   | 26 | Singlet-A | 0.0358 | 3.7861 | 327.47 | 30537.1  |          |
| = | =  | =         | =      | =      | =      | 131->140 | 0.10516  |
| = | =  | =         | =      | =      | =      | 137->143 | 0.38305  |
| = | =  | =         | =      | =      | =      | 137->144 | 0.51789  |
| = | =  | =         | =      | =      | =      | 137->146 | -0.14448 |
|   | 27 | Singlet-A | 0.0548 | 3.7943 | 326.77 | 30602.6  |          |
| = | =  | =         | =      | =      | =      | 127->139 | 0.18953  |
| = | =  | =         | =      | =      | =      | 128->140 | -0.14013 |
| = | =  | =         | =      | =      | =      | 133->140 | -0.35421 |
| = | =  | =         | =      | =      | =      | 134->140 | 0.35865  |
| = | =  | =         | =      | =      | =      | 137->143 | -0.17532 |
| = | =  | =         | =      | =      | =      | 137->144 | 0.12316  |
| = | =  | =         | =      | =      | =      | 137->145 | -0.2908  |

|   |    |           |        |        |        |         |          |          |
|---|----|-----------|--------|--------|--------|---------|----------|----------|
|   | 28 | Singlet-A | 0.0164 | 3.8072 | 325.66 | 30706.9 |          |          |
| = | =  | =         | =      | =      | =      | =       | 128->140 | 0.13348  |
| = | =  | =         | =      | =      | =      | =       | 133->140 | 0.47823  |
| = | =  | =         | =      | =      | =      | =       | 134->140 | 0.19724  |
| = | =  | =         | =      | =      | =      | =       | 137->143 | -0.24826 |
| = | =  | =         | =      | =      | =      | =       | 137->144 | 0.25749  |
| = | =  | =         | =      | =      | =      | =       | 137->145 | -0.12323 |
| = | =  | =         | =      | =      | =      | =       | 137->146 | 0.19092  |
|   | 29 | Singlet-A | 0.0091 | 3.8116 | 325.28 | 30742.7 |          |          |
| = | =  | =         | =      | =      | =      | =       | 131->140 | -0.13677 |
| = | =  | =         | =      | =      | =      | =       | 132->140 | 0.63237  |
| = | =  | =         | =      | =      | =      | =       | 137->144 | 0.12347  |
| = | =  | =         | =      | =      | =      | =       | 137->145 | 0.12155  |
|   | 30 | Singlet-A | 0.0156 | 3.8262 | 324.04 | 30860.4 |          |          |
| = | =  | =         | =      | =      | =      | =       | 130->140 | 0.27295  |
| = | =  | =         | =      | =      | =      | =       | 131->140 | 0.54998  |
| = | =  | =         | =      | =      | =      | =       | 137->143 | 0.11699  |
| = | =  | =         | =      | =      | =      | =       | 137->144 | -0.11916 |
| = | =  | =         | =      | =      | =      | =       | 137->145 | 0.11925  |
| = | =  | =         | =      | =      | =      | =       | 137->146 | 0.21714  |

### Corrole 6b in DCM

#### Coordinates:

|   |          |          |          |
|---|----------|----------|----------|
| C | 0.44724  | -3.88113 | -0.29949 |
| C | -0.94833 | -3.91347 | -0.35288 |
| C | -1.43983 | -2.64004 | 0.01204  |
| C | 0.83696  | -2.59361 | 0.10886  |
| C | 2.0274   | -1.81953 | 0.1285   |
| C | 3.03495  | 0.20387  | 0.08671  |
| C | 4.04943  | -0.79319 | 0.07651  |
| C | 3.4279   | -2.03721 | 0.09725  |
| C | -2.71779 | -2.0461  | 0.00142  |
| C | -2.93588 | -0.67239 | 0.02849  |
| C | -4.17319 | 0.04286  | 0.13502  |
| C | -3.90709 | 1.38795  | 0.12314  |
| C | -2.49086 | 1.56728  | 0.00516  |
| C | -1.73927 | 2.73471  | -0.05469 |
| C | -0.33266 | 2.83705  | -0.08949 |
| C | 0.3893   | 4.09452  | -0.13134 |
| C | 1.71449  | 3.78522  | -0.12432 |

|   |          |          |          |
|---|----------|----------|----------|
| C | 1.80379  | 2.3413   | -0.07103 |
| C | 2.99459  | 1.60643  | -0.01158 |
| N | -0.32693 | -1.88476 | 0.30529  |
| H | -0.37845 | -1.10843 | 0.95153  |
| N | 1.85438  | -0.47137 | 0.14465  |
| N | 0.53784  | 1.79809  | -0.06231 |
| N | -1.95312 | 0.30312  | -0.02404 |
| H | -1.01576 | 0.17169  | -0.37745 |
| H | -0.06668 | 5.07721  | -0.16039 |
| H | 2.55863  | 4.46466  | -0.14009 |
| H | 5.11505  | -0.606   | 0.04666  |
| H | 3.91312  | -3.00421 | 0.10306  |
| H | 1.11998  | -4.67363 | -0.5997  |
| H | -1.55716 | -4.74046 | -0.69448 |
| H | -5.14114 | -0.43106 | 0.23684  |
| H | -4.622   | 2.19648  | 0.20606  |
| H | 0.99571  | 0.08344  | 0.04516  |
| H | -3.58844 | -2.68984 | -0.066   |
| H | 3.93275  | 2.15132  | -0.05156 |
| H | -2.29785 | 3.66619  | -0.05464 |

### Frequencies:

|             |    |         |         |       |
|-------------|----|---------|---------|-------|
|             |    | 1       | 2       | 3     |
| Frequencies | -- | 68.3702 | 74.6811 | 92.19 |

### TDDFT:

| Order | Symm      | f      | Energy_eV | Energy_nm | Energy_cm-1 | Transition | Coef     |
|-------|-----------|--------|-----------|-----------|-------------|------------|----------|
| 1     | Singlet-A | 0.0596 | 2.3006    | 538.92    | 18555.6     |            |          |
| =     | =         | =      | =         | =         | =           | 77->79     | 0.30389  |
| =     | =         | =      | =         | =         | =           | 77->80     | 0.26116  |
| =     | =         | =      | =         | =         | =           | 78->79     | 0.50655  |
| =     | =         | =      | =         | =         | =           | 78->80     | -0.28176 |
| 2     | Singlet-A | 0.055  | 2.3574    | 525.94    | 19013.6     |            |          |
| =     | =         | =      | =         | =         | =           | 77->79     | 0.42698  |
| =     | =         | =      | =         | =         | =           | 77->80     | -0.19038 |
| =     | =         | =      | =         | =         | =           | 78->79     | -0.36906 |
| =     | =         | =      | =         | =         | =           | 78->80     | -0.37451 |
| 3     | Singlet-A | 0.0098 | 3.1155    | 397.96    | 25128.2     |            |          |

|   |    |           |        |        |        |         |        |          |
|---|----|-----------|--------|--------|--------|---------|--------|----------|
| = | =  | =         | =      | =      | =      | =       | 76->79 | 0.68503  |
|   | 4  | Singlet-A | 0.7933 | 3.2021 | 387.19 | 25827.1 |        |          |
| = | =  | =         | =      | =      | =      | =       | 76->80 | -0.1741  |
| = | =  | =         | =      | =      | =      | =       | 77->79 | 0.39002  |
| = | =  | =         | =      | =      | =      | =       | 77->80 | 0.31102  |
| = | =  | =         | =      | =      | =      | =       | 78->79 | -0.14834 |
| = | =  | =         | =      | =      | =      | =       | 78->80 | 0.4313   |
|   | 5  | Singlet-A | 0.8729 | 3.2853 | 377.39 | 26497.8 |        |          |
| = | =  | =         | =      | =      | =      | =       | 76->79 | -0.14358 |
| = | =  | =         | =      | =      | =      | =       | 77->79 | -0.23895 |
| = | =  | =         | =      | =      | =      | =       | 77->80 | 0.51058  |
| = | =  | =         | =      | =      | =      | =       | 78->79 | -0.27254 |
| = | =  | =         | =      | =      | =      | =       | 78->80 | -0.25607 |
|   | 6  | Singlet-A | 0.0015 | 3.585  | 345.84 | 28915.1 |        |          |
| = | =  | =         | =      | =      | =      | =       | 74->79 | -0.31335 |
| = | =  | =         | =      | =      | =      | =       | 75->79 | 0.61154  |
| = | =  | =         | =      | =      | =      | =       | 76->80 | -0.12881 |
|   | 7  | Singlet-A | 0.1105 | 3.6319 | 341.37 | 29293.7 |        |          |
| = | =  | =         | =      | =      | =      | =       | 75->79 | 0.11519  |
| = | =  | =         | =      | =      | =      | =       | 76->80 | 0.6504   |
| = | =  | =         | =      | =      | =      | =       | 78->81 | -0.13546 |
|   | 8  | Singlet-A | 0.0498 | 3.7106 | 334.13 | 29928.5 |        |          |
| = | =  | =         | =      | =      | =      | =       | 74->79 | 0.60732  |
| = | =  | =         | =      | =      | =      | =       | 75->79 | 0.30623  |
|   | 9  | Singlet-A | 0.0237 | 3.8718 | 320.22 | 31228.5 |        |          |
| = | =  | =         | =      | =      | =      | =       | 71->79 | -0.1082  |
| = | =  | =         | =      | =      | =      | =       | 72->79 | 0.12814  |
| = | =  | =         | =      | =      | =      | =       | 73->79 | 0.554    |
| = | =  | =         | =      | =      | =      | =       | 78->81 | -0.36655 |
|   | 10 | Singlet-A | 0.0268 | 3.9145 | 316.73 | 31572.6 |        |          |
| = | =  | =         | =      | =      | =      | =       | 71->79 | -0.14598 |
| = | =  | =         | =      | =      | =      | =       | 72->79 | 0.42782  |
| = | =  | =         | =      | =      | =      | =       | 73->79 | -0.36468 |
| = | =  | =         | =      | =      | =      | =       | 74->79 | -0.10096 |
| = | =  | =         | =      | =      | =      | =       | 75->80 | -0.17928 |
| = | =  | =         | =      | =      | =      | =       | 78->81 | -0.31327 |
|   | 11 | Singlet-A | 0.0834 | 3.9587 | 313.19 | 31929.5 |        |          |
| = | =  | =         | =      | =      | =      | =       | 71->79 | 0.16644  |
| = | =  | =         | =      | =      | =      | =       | 72->79 | 0.48538  |
| = | =  | =         | =      | =      | =      | =       | 73->79 | 0.18537  |
| = | =  | =         | =      | =      | =      | =       | 75->80 | -0.106   |
| = | =  | =         | =      | =      | =      | =       | 78->81 | 0.37822  |
|   | 12 | Singlet-A | 0.0136 | 4.0272 | 307.87 | 32481.2 |        |          |

|    |           |        |        |        |         |        |          |
|----|-----------|--------|--------|--------|---------|--------|----------|
| =  | =         | =      | =      | =      | =       | 72->79 | 0.16936  |
| =  | =         | =      | =      | =      | =       | 73->80 | 0.11731  |
| =  | =         | =      | =      | =      | =       | 74->80 | -0.33781 |
| =  | =         | =      | =      | =      | =       | 75->80 | 0.57144  |
| 13 | Singlet-A | 0.0157 | 4.1427 | 299.28 | 33413.5 |        |          |
| =  | =         | =      | =      | =      | =       | 72->79 | 0.11456  |
| =  | =         | =      | =      | =      | =       | 74->80 | 0.59621  |
| =  | =         | =      | =      | =      | =       | 75->80 | 0.30573  |
| =  | =         | =      | =      | =      | =       | 77->81 | -0.10091 |
| 14 | Singlet-A | 0.1459 | 4.1707 | 297.27 | 33639.5 |        |          |
| =  | =         | =      | =      | =      | =       | 70->79 | 0.20813  |
| =  | =         | =      | =      | =      | =       | 71->79 | 0.47749  |
| =  | =         | =      | =      | =      | =       | 71->80 | -0.11504 |
| =  | =         | =      | =      | =      | =       | 77->80 | -0.11028 |
| =  | =         | =      | =      | =      | =       | 77->81 | -0.38138 |
| =  | =         | =      | =      | =      | =       | 78->81 | -0.14697 |
| =  | =         | =      | =      | =      | =       | 78->82 | 0.11459  |
| 15 | Singlet-A | 0.0256 | 4.3623 | 284.22 | 35184   |        |          |
| =  | =         | =      | =      | =      | =       | 70->79 | 0.26562  |
| =  | =         | =      | =      | =      | =       | 70->80 | 0.25937  |
| =  | =         | =      | =      | =      | =       | 71->79 | -0.23434 |
| =  | =         | =      | =      | =      | =       | 72->80 | -0.20561 |
| =  | =         | =      | =      | =      | =       | 73->80 | 0.38546  |
| =  | =         | =      | =      | =      | =       | 77->81 | -0.25965 |
| =  | =         | =      | =      | =      | =       | 78->81 | 0.12086  |
| 16 | Singlet-A | 0.0176 | 4.3648 | 284.06 | 35203.8 |        |          |
| =  | =         | =      | =      | =      | =       | 72->80 | 0.60219  |
| =  | =         | =      | =      | =      | =       | 73->80 | 0.31684  |
| 17 | Singlet-A | 0.0651 | 4.4431 | 279.05 | 35835.9 |        |          |
| =  | =         | =      | =      | =      | =       | 70->80 | -0.22043 |
| =  | =         | =      | =      | =      | =       | 71->79 | 0.27401  |
| =  | =         | =      | =      | =      | =       | 72->80 | -0.22738 |
| =  | =         | =      | =      | =      | =       | 73->80 | 0.41897  |
| =  | =         | =      | =      | =      | =       | 74->80 | 0.13118  |
| =  | =         | =      | =      | =      | =       | 77->81 | 0.29794  |
| =  | =         | =      | =      | =      | =       | 78->82 | 0.11454  |
| 18 | Singlet-A | 0.0211 | 4.4509 | 278.56 | 35898.9 |        |          |
| =  | =         | =      | =      | =      | =       | 70->79 | 0.4932   |
| =  | =         | =      | =      | =      | =       | 71->80 | 0.34192  |
| =  | =         | =      | =      | =      | =       | 73->80 | -0.18055 |
| =  | =         | =      | =      | =      | =       | 77->81 | 0.23359  |
| =  | =         | =      | =      | =      | =       | 78->82 | 0.12438  |
| 19 | Singlet-A | 0.0922 | 4.7943 | 258.61 | 38668.3 |        |          |

|    |           |        |        |        |         |        |          |
|----|-----------|--------|--------|--------|---------|--------|----------|
| =  | =         | =      | =      | =      | =       | 70->80 | 0.43226  |
| =  | =         | =      | =      | =      | =       | 71->80 | -0.20436 |
| =  | =         | =      | =      | =      | =       | 77->81 | 0.20098  |
| =  | =         | =      | =      | =      | =       | 78->82 | 0.43159  |
| 20 | Singlet-A | 0.0349 | 4.827  | 256.86 | 38931.7 |        |          |
| =  | =         | =      | =      | =      | =       | 70->79 | -0.20048 |
| =  | =         | =      | =      | =      | =       | 70->80 | 0.2086   |
| =  | =         | =      | =      | =      | =       | 71->80 | 0.44639  |
| =  | =         | =      | =      | =      | =       | 76->81 | 0.21184  |
| =  | =         | =      | =      | =      | =       | 77->81 | -0.10196 |
| =  | =         | =      | =      | =      | =       | 77->82 | 0.30946  |
| =  | =         | =      | =      | =      | =       | 78->81 | -0.1417  |
| 21 | Singlet-A | 0.0208 | 5.0395 | 246.03 | 40645.4 |        |          |
| =  | =         | =      | =      | =      | =       | 70->80 | -0.11277 |
| =  | =         | =      | =      | =      | =       | 76->81 | 0.63578  |
| =  | =         | =      | =      | =      | =       | 77->82 | -0.22885 |
| 22 | Singlet-A | 0.1291 | 5.2076 | 238.09 | 42000.9 |        |          |
| =  | =         | =      | =      | =      | =       | 69->79 | -0.15542 |
| =  | =         | =      | =      | =      | =       | 70->79 | -0.12868 |
| =  | =         | =      | =      | =      | =       | 70->80 | -0.13482 |
| =  | =         | =      | =      | =      | =       | 71->79 | -0.10405 |
| =  | =         | =      | =      | =      | =       | 71->80 | 0.1424   |
| =  | =         | =      | =      | =      | =       | 76->81 | -0.123   |
| =  | =         | =      | =      | =      | =       | 77->81 | -0.15565 |
| =  | =         | =      | =      | =      | =       | 77->82 | -0.20493 |
| =  | =         | =      | =      | =      | =       | 78->82 | 0.35161  |
| =  | =         | =      | =      | =      | =       | 78->83 | 0.41527  |
| 23 | Singlet-A | 0.0638 | 5.3586 | 231.37 | 43220.8 |        |          |
| =  | =         | =      | =      | =      | =       | 69->79 | 0.49396  |
| =  | =         | =      | =      | =      | =       | 78->82 | -0.1045  |
| =  | =         | =      | =      | =      | =       | 78->83 | 0.3302   |
| =  | =         | =      | =      | =      | =       | 78->84 | 0.31672  |
| 24 | Singlet-A | 0.0075 | 5.4418 | 227.84 | 43890.4 |        |          |
| =  | =         | =      | =      | =      | =       | 69->79 | 0.11115  |
| =  | =         | =      | =      | =      | =       | 70->80 | -0.22947 |
| =  | =         | =      | =      | =      | =       | 71->79 | -0.12657 |
| =  | =         | =      | =      | =      | =       | 72->81 | 0.12527  |
| =  | =         | =      | =      | =      | =       | 74->81 | -0.11358 |
| =  | =         | =      | =      | =      | =       | 75->81 | 0.152    |
| =  | =         | =      | =      | =      | =       | 77->82 | 0.42859  |
| =  | =         | =      | =      | =      | =       | 77->83 | 0.23065  |
| =  | =         | =      | =      | =      | =       | 78->82 | 0.21718  |
| 25 | Singlet-A | 0.0432 | 5.5346 | 224.02 | 44638.9 |        |          |



|   |    |           |        |        |        |         |          |
|---|----|-----------|--------|--------|--------|---------|----------|
| = | =  | =         | =      | =      | =      | 70->80  | -0.10342 |
| = | =  | =         | =      | =      | =      | 71->80  | 0.11483  |
| = | =  | =         | =      | =      | =      | 74->81  | -0.20924 |
| = | =  | =         | =      | =      | =      | 77->81  | -0.11409 |
| = | =  | =         | =      | =      | =      | 77->83  | -0.134   |
| = | =  | =         | =      | =      | =      | 78->82  | 0.16867  |
| = | =  | =         | =      | =      | =      | 78->83  | -0.30542 |
| = | =  | =         | =      | =      | =      | 78->84  | 0.47781  |
|   | 26 | Singlet-A | 0.0345 | 5.5484 | 223.46 | 44750.7 |          |
| = | =  | =         | =      | =      | =      | 74->81  | -0.43118 |
| = | =  | =         | =      | =      | =      | 75->81  | 0.47168  |
| = | =  | =         | =      | =      | =      | 77->82  | -0.11449 |
| = | =  | =         | =      | =      | =      | 78->82  | -0.10029 |
| = | =  | =         | =      | =      | =      | 78->84  | -0.1419  |
|   | 27 | Singlet-A | 0.0389 | 5.5792 | 222.23 | 44998.4 |          |
| = | =  | =         | =      | =      | =      | 69->79  | 0.35031  |
| = | =  | =         | =      | =      | =      | 70->81  | -0.12683 |
| = | =  | =         | =      | =      | =      | 71->80  | 0.13999  |
| = | =  | =         | =      | =      | =      | 74->81  | 0.13039  |
| = | =  | =         | =      | =      | =      | 77->82  | -0.21478 |
| = | =  | =         | =      | =      | =      | 77->83  | 0.15542  |
| = | =  | =         | =      | =      | =      | 78->82  | 0.13725  |
| = | =  | =         | =      | =      | =      | 78->83  | -0.2773  |
| = | =  | =         | =      | =      | =      | 78->84  | -0.27763 |
|   | 28 | Singlet-A | 0.024  | 5.7069 | 217.25 | 46029.9 |          |
| = | =  | =         | =      | =      | =      | 69->79  | -0.15273 |
| = | =  | =         | =      | =      | =      | 69->80  | 0.21671  |
| = | =  | =         | =      | =      | =      | 74->81  | 0.24479  |
| = | =  | =         | =      | =      | =      | 75->81  | 0.237    |
| = | =  | =         | =      | =      | =      | 77->83  | 0.448    |
| = | =  | =         | =      | =      | =      | 77->84  | 0.20276  |
| = | =  | =         | =      | =      | =      | 78->84  | 0.1655   |
|   | 29 | Singlet-A | 0.0293 | 5.7597 | 215.26 | 46455.4 |          |
| = | =  | =         | =      | =      | =      | 69->80  | 0.34634  |
| = | =  | =         | =      | =      | =      | 71->81  | -0.10244 |
| = | =  | =         | =      | =      | =      | 72->81  | -0.10909 |
| = | =  | =         | =      | =      | =      | 73->81  | 0.29917  |
| = | =  | =         | =      | =      | =      | 74->81  | -0.29354 |
| = | =  | =         | =      | =      | =      | 75->81  | -0.31743 |
| = | =  | =         | =      | =      | =      | 77->83  | 0.1118   |
| = | =  | =         | =      | =      | =      | 77->84  | 0.17225  |
|   | 30 | Singlet-A | 0.0055 | 5.8466 | 212.06 | 47156.5 |          |
| = | =  | =         | =      | =      | =      | 69->80  | -0.30238 |

|    |           |        |        |        |         |        |          |
|----|-----------|--------|--------|--------|---------|--------|----------|
| =  | =         | =      | =      | =      | =       | 71->81 | 0.13463  |
| =  | =         | =      | =      | =      | =       | 72->81 | -0.23529 |
| =  | =         | =      | =      | =      | =       | 73->81 | 0.45961  |
| =  | =         | =      | =      | =      | =       | 77->83 | 0.10383  |
| =  | =         | =      | =      | =      | =       | 77->84 | -0.22186 |
| =  | =         | =      | =      | =      | =       | 78->84 | 0.10228  |
| 31 | Singlet-A | 0.011  | 5.9014 | 210.09 | 47598.6 |        |          |
| =  | =         | =      | =      | =      | =       | 69->80 | 0.33632  |
| =  | =         | =      | =      | =      | =       | 70->81 | -0.10926 |
| =  | =         | =      | =      | =      | =       | 71->81 | -0.1683  |
| =  | =         | =      | =      | =      | =       | 72->81 | -0.1276  |
| =  | =         | =      | =      | =      | =       | 73->81 | 0.17481  |
| =  | =         | =      | =      | =      | =       | 74->81 | 0.23759  |
| =  | =         | =      | =      | =      | =       | 75->81 | 0.21459  |
| =  | =         | =      | =      | =      | =       | 77->83 | -0.28056 |
| =  | =         | =      | =      | =      | =       | 77->84 | -0.20214 |
| 32 | Singlet-A | 0.0001 | 5.9385 | 208.78 | 47897.3 |        |          |
| =  | =         | =      | =      | =      | =       | 71->81 | 0.29706  |
| =  | =         | =      | =      | =      | =       | 73->81 | 0.18044  |
| =  | =         | =      | =      | =      | =       | 76->82 | -0.28902 |
| =  | =         | =      | =      | =      | =       | 77->83 | -0.20753 |
| =  | =         | =      | =      | =      | =       | 77->84 | 0.4367   |
| 33 | Singlet-A | 0.0178 | 6.0193 | 205.98 | 48548.4 |        |          |
| =  | =         | =      | =      | =      | =       | 71->81 | 0.15624  |
| =  | =         | =      | =      | =      | =       | 72->81 | 0.21508  |
| =  | =         | =      | =      | =      | =       | 73->81 | 0.13595  |
| =  | =         | =      | =      | =      | =       | 76->82 | 0.55985  |
| =  | =         | =      | =      | =      | =       | 76->83 | 0.15585  |
| =  | =         | =      | =      | =      | =       | 77->84 | 0.12909  |
| 34 | Singlet-A | 0.0022 | 6.045  | 205.1  | 48756.7 |        |          |
| =  | =         | =      | =      | =      | =       | 71->81 | 0.14721  |
| =  | =         | =      | =      | =      | =       | 78->85 | 0.66101  |
| =  | =         | =      | =      | =      | =       | 78->86 | 0.14008  |
| 35 | Singlet-A | 0.0002 | 6.067  | 204.36 | 48933.3 |        |          |
| =  | =         | =      | =      | =      | =       | 68->79 | 0.70484  |
| 36 | Singlet-A | 0.1106 | 6.2027 | 199.89 | 50027.5 |        |          |
| =  | =         | =      | =      | =      | =       | 70->81 | -0.27854 |
| =  | =         | =      | =      | =      | =       | 71->81 | -0.13857 |
| =  | =         | =      | =      | =      | =       | 72->81 | 0.4514   |
| =  | =         | =      | =      | =      | =       | 73->81 | 0.21015  |
| =  | =         | =      | =      | =      | =       | 75->82 | -0.1275  |
| =  | =         | =      | =      | =      | =       | 76->82 | -0.13674 |
| =  | =         | =      | =      | =      | =       | 77->85 | -0.10903 |

|   |    |           |        |        |        |         |          |
|---|----|-----------|--------|--------|--------|---------|----------|
| = | =  | =         | =      | =      | =      | 78->86  | 0.14876  |
|   | 37 | Singlet-A | 0.0093 | 6.2186 | 199.38 | 50155.5 |          |
| = | =  | =         | =      | =      | =      | 69->80  | -0.11446 |
| = | =  | =         | =      | =      | =      | 70->81  | -0.17143 |
| = | =  | =         | =      | =      | =      | 71->81  | -0.29808 |
| = | =  | =         | =      | =      | =      | 72->81  | -0.21749 |
| = | =  | =         | =      | =      | =      | 76->82  | 0.10382  |
| = | =  | =         | =      | =      | =      | 77->84  | 0.20108  |
| = | =  | =         | =      | =      | =      | 78->86  | 0.45985  |
|   | 38 | Singlet-A | 0.0006 | 6.2577 | 198.13 | 50471.9 |          |
| = | =  | =         | =      | =      | =      | 67->79  | 0.70206  |
|   | 39 | Singlet-A | 0.0134 | 6.3215 | 196.13 | 50986.6 |          |
| = | =  | =         | =      | =      | =      | 70->81  | -0.30333 |
| = | =  | =         | =      | =      | =      | 71->81  | 0.1262   |
| = | =  | =         | =      | =      | =      | 77->85  | 0.55124  |
| = | =  | =         | =      | =      | =      | 77->86  | 0.1438   |
|   | 40 | Singlet-A | 0.0011 | 6.3551 | 195.09 | 51258.4 |          |
| = | =  | =         | =      | =      | =      | 66->79  | 0.67678  |
| = | =  | =         | =      | =      | =      | 77->85  | 0.15661  |

### Corrole 6b in DMF

#### Coordinates:

|   |          |          |          |
|---|----------|----------|----------|
| C | 0.45226  | -3.88009 | -0.30133 |
| C | -0.94329 | -3.91414 | -0.35443 |
| C | -1.43633 | -2.64196 | 0.01344  |
| C | 0.84027  | -2.5928  | 0.11001  |
| C | 2.02972  | -1.81728 | 0.12955  |
| C | 3.03483  | 0.20769  | 0.08709  |
| C | 4.05057  | -0.78836 | 0.07322  |
| C | 3.43056  | -2.03323 | 0.09416  |
| C | -2.71502 | -2.04975 | 0.00233  |
| C | -2.93484 | -0.67619 | 0.02962  |
| C | -4.17364 | 0.03725  | 0.13225  |
| C | -3.90957 | 1.38285  | 0.11966  |
| C | -2.49315 | 1.56408  | 0.00492  |
| C | -1.74318 | 2.73292  | -0.05499 |
| C | -0.3366  | 2.83722  | -0.08881 |
| C | 0.38395  | 4.09541  | -0.13207 |
| C | 1.70987  | 3.78764  | -0.12493 |
| C | 1.80112  | 2.34393  | -0.07006 |

|   |          |          |          |
|---|----------|----------|----------|
| C | 2.99309  | 1.61024  | -0.01152 |
| N | -0.32444 | -1.8855  | 0.30829  |
| H | -0.37695 | -1.11378 | 0.96002  |
| N | 1.85504  | -0.46915 | 0.14803  |
| N | 0.53558  | 1.7991   | -0.06022 |
| N | -1.95344 | 0.30076  | -0.02135 |
| H | -1.01397 | 0.16966  | -0.36904 |
| H | -0.07325 | 5.07753  | -0.16235 |
| H | 2.5532   | 4.4681   | -0.14186 |
| H | 5.11587  | -0.59971 | 0.04039  |
| H | 3.91665  | -2.99982 | 0.09678  |
| H | 1.1261   | -4.67103 | -0.60319 |
| H | -1.5513  | -4.74107 | -0.69764 |
| H | -5.14111 | -0.43819 | 0.23142  |
| H | -4.62594 | 2.19042  | 0.19935  |
| H | 0.99516  | 0.08393  | 0.0512   |
| H | -3.5848  | -2.69447 | -0.06692 |
| H | 3.93074  | 2.15591  | -0.05328 |
| H | -2.30327 | 3.66349  | -0.05668 |

### Frequencies:

|             |    |         |         |         |
|-------------|----|---------|---------|---------|
|             |    | 1       | 2       | 3       |
| Frequencies | -- | 67.8703 | 74.4566 | 92.0582 |

### TDDFT:

| Order | Symm      | f      | Energy_eV | Energy_nm | Energy_cm-1 | Transition | Coef     |
|-------|-----------|--------|-----------|-----------|-------------|------------|----------|
| 1     | Singlet-A | 0.0603 | 2.3005    | 538.95    | 18554.6     |            |          |
| =     | =         | =      | =         | =         | =           | 77->79     | 0.29755  |
| =     | =         | =      | =         | =         | =           | 77->80     | 0.26444  |
| =     | =         | =      | =         | =         | =           | 78->79     | 0.51105  |
| =     | =         | =      | =         | =         | =           | 78->80     | -0.27737 |
| 2     | Singlet-A | 0.0531 | 2.3584    | 525.72    | 19021.5     |            |          |
| =     | =         | =      | =         | =         | =           | 77->79     | 0.43024  |
| =     | =         | =      | =         | =         | =           | 77->80     | -0.18752 |
| =     | =         | =      | =         | =         | =           | 78->79     | -0.36194 |
| =     | =         | =      | =         | =         | =           | 78->80     | -0.37907 |
| 3     | Singlet-A | 0.0123 | 3.1286    | 396.3     | 25233.4     |            |          |
| =     | =         | =      | =         | =         | =           | 76->79     | 0.6831   |

|   |    |           |        |        |        |         |          |
|---|----|-----------|--------|--------|--------|---------|----------|
| = | =  | =         | =      | =      | =      | 77->80  | 0.1106   |
|   | 4  | Singlet-A | 0.8053 | 3.2027 | 387.12 | 25831.8 |          |
| = | =  | =         | =      | =      | =      | 76->80  | -0.1699  |
| = | =  | =         | =      | =      | =      | 77->79  | 0.39346  |
| = | =  | =         | =      | =      | =      | 77->80  | 0.30714  |
| = | =  | =         | =      | =      | =      | 78->79  | -0.14705 |
| = | =  | =         | =      | =      | =      | 78->80  | 0.43363  |
|   | 5  | Singlet-A | 0.8736 | 3.2838 | 377.56 | 26485.9 |          |
| = | =  | =         | =      | =      | =      | 76->79  | -0.15315 |
| = | =  | =         | =      | =      | =      | 77->79  | -0.23641 |
| = | =  | =         | =      | =      | =      | 77->80  | 0.51065  |
| = | =  | =         | =      | =      | =      | 78->79  | -0.27375 |
| = | =  | =         | =      | =      | =      | 78->80  | -0.2522  |
|   | 6  | Singlet-A | 0.0015 | 3.5896 | 345.4  | 28951.9 |          |
| = | =  | =         | =      | =      | =      | 74->79  | -0.3067  |
| = | =  | =         | =      | =      | =      | 75->79  | 0.61487  |
| = | =  | =         | =      | =      | =      | 76->80  | -0.1248  |
|   | 7  | Singlet-A | 0.106  | 3.6383 | 340.77 | 29345.3 |          |
| = | =  | =         | =      | =      | =      | 75->79  | 0.11202  |
| = | =  | =         | =      | =      | =      | 76->80  | 0.65197  |
| = | =  | =         | =      | =      | =      | 78->81  | -0.13726 |
|   | 8  | Singlet-A | 0.0484 | 3.7153 | 333.71 | 29966.1 |          |
| = | =  | =         | =      | =      | =      | 74->79  | 0.60919  |
| = | =  | =         | =      | =      | =      | 75->79  | 0.2999   |
|   | 9  | Singlet-A | 0.0194 | 3.8692 | 320.44 | 31207.1 |          |
| = | =  | =         | =      | =      | =      | 72->79  | 0.1056   |
| = | =  | =         | =      | =      | =      | 73->79  | 0.5856   |
| = | =  | =         | =      | =      | =      | 78->81  | -0.32812 |
|   | 10 | Singlet-A | 0.0277 | 3.9103 | 317.07 | 31538.8 |          |
| = | =  | =         | =      | =      | =      | 71->79  | -0.14249 |
| = | =  | =         | =      | =      | =      | 72->79  | 0.46766  |
| = | =  | =         | =      | =      | =      | 73->79  | -0.30711 |
| = | =  | =         | =      | =      | =      | 74->79  | -0.10712 |
| = | =  | =         | =      | =      | =      | 75->80  | -0.18707 |
| = | =  | =         | =      | =      | =      | 78->81  | -0.31534 |
|   | 11 | Singlet-A | 0.0891 | 3.9559 | 313.42 | 31906.1 |          |
| = | =  | =         | =      | =      | =      | 71->79  | 0.17777  |
| = | =  | =         | =      | =      | =      | 72->79  | 0.4519   |
| = | =  | =         | =      | =      | =      | 73->79  | 0.18957  |
| = | =  | =         | =      | =      | =      | 78->81  | 0.40888  |
|   | 12 | Singlet-A | 0.0147 | 4.0271 | 307.87 | 32481.2 |          |
| = | =  | =         | =      | =      | =      | 72->79  | 0.17077  |
| = | =  | =         | =      | =      | =      | 73->80  | 0.12152  |

|    |           |        |        |        |         |        |          |
|----|-----------|--------|--------|--------|---------|--------|----------|
| =  | =         | =      | =      | =      | =       | 74->80 | -0.324   |
| =  | =         | =      | =      | =      | =       | 75->80 | 0.57682  |
| 13 | Singlet-A | 0.0163 | 4.142  | 299.33 | 33407.9 |        |          |
| =  | =         | =      | =      | =      | =       | 72->79 | 0.11113  |
| =  | =         | =      | =      | =      | =       | 74->80 | 0.60165  |
| =  | =         | =      | =      | =      | =       | 75->80 | 0.29574  |
| 14 | Singlet-A | 0.1425 | 4.1718 | 297.19 | 33648.5 |        |          |
| =  | =         | =      | =      | =      | =       | 70->79 | 0.20729  |
| =  | =         | =      | =      | =      | =       | 71->79 | 0.47882  |
| =  | =         | =      | =      | =      | =       | 71->80 | -0.11398 |
| =  | =         | =      | =      | =      | =       | 77->80 | -0.10958 |
| =  | =         | =      | =      | =      | =       | 77->81 | -0.38062 |
| =  | =         | =      | =      | =      | =       | 78->81 | -0.14755 |
| =  | =         | =      | =      | =      | =       | 78->82 | 0.11412  |
| 15 | Singlet-A | 0.0101 | 4.3553 | 284.67 | 35128.4 |        |          |
| =  | =         | =      | =      | =      | =       | 72->80 | 0.53792  |
| =  | =         | =      | =      | =      | =       | 73->80 | 0.4055   |
| 16 | Singlet-A | 0.0359 | 4.3605 | 284.33 | 35170.4 |        |          |
| =  | =         | =      | =      | =      | =       | 70->79 | 0.25601  |
| =  | =         | =      | =      | =      | =       | 70->80 | 0.23233  |
| =  | =         | =      | =      | =      | =       | 71->79 | -0.20679 |
| =  | =         | =      | =      | =      | =       | 72->80 | -0.34169 |
| =  | =         | =      | =      | =      | =       | 73->80 | 0.34447  |
| =  | =         | =      | =      | =      | =       | 77->81 | -0.24425 |
| 17 | Singlet-A | 0.062  | 4.4387 | 279.33 | 35799.9 |        |          |
| =  | =         | =      | =      | =      | =       | 70->79 | -0.13233 |
| =  | =         | =      | =      | =      | =       | 70->80 | -0.23606 |
| =  | =         | =      | =      | =      | =       | 71->79 | 0.28513  |
| =  | =         | =      | =      | =      | =       | 72->80 | -0.23349 |
| =  | =         | =      | =      | =      | =       | 73->80 | 0.39994  |
| =  | =         | =      | =      | =      | =       | 74->80 | 0.13798  |
| =  | =         | =      | =      | =      | =       | 77->81 | 0.28059  |
| 18 | Singlet-A | 0.0205 | 4.4512 | 278.54 | 35901.5 |        |          |
| =  | =         | =      | =      | =      | =       | 70->79 | 0.48502  |
| =  | =         | =      | =      | =      | =       | 71->80 | 0.35621  |
| =  | =         | =      | =      | =      | =       | 73->80 | -0.1074  |
| =  | =         | =      | =      | =      | =       | 77->81 | 0.26822  |
| =  | =         | =      | =      | =      | =       | 78->82 | 0.1363   |
| 19 | Singlet-A | 0.0943 | 4.7932 | 258.67 | 38659.3 |        |          |
| =  | =         | =      | =      | =      | =       | 70->80 | 0.42923  |
| =  | =         | =      | =      | =      | =       | 71->80 | -0.20856 |
| =  | =         | =      | =      | =      | =       | 77->81 | 0.20725  |
| =  | =         | =      | =      | =      | =       | 78->82 | 0.43248  |

|   |    |           |        |        |        |         |        |          |
|---|----|-----------|--------|--------|--------|---------|--------|----------|
|   | 20 | Singlet-A | 0.0324 | 4.8283 | 256.79 | 38942.3 |        |          |
| = | =  | =         | =      | =      | =      | =       | 70->79 | -0.20518 |
| = | =  | =         | =      | =      | =      | =       | 70->80 | 0.21759  |
| = | =  | =         | =      | =      | =      | =       | 71->80 | 0.44352  |
| = | =  | =         | =      | =      | =      | =       | 76->81 | 0.20201  |
| = | =  | =         | =      | =      | =      | =       | 77->82 | 0.31147  |
| = | =  | =         | =      | =      | =      | =       | 78->81 | -0.14461 |
|   | 21 | Singlet-A | 0.0203 | 5.0522 | 245.41 | 40748.1 |        |          |
| = | =  | =         | =      | =      | =      | =       | 70->80 | -0.10608 |
| = | =  | =         | =      | =      | =      | =       | 76->81 | 0.63883  |
| = | =  | =         | =      | =      | =      | =       | 77->82 | -0.2257  |
|   | 22 | Singlet-A | 0.1314 | 5.2132 | 237.83 | 42046.8 |        |          |
| = | =  | =         | =      | =      | =      | =       | 69->79 | -0.1565  |
| = | =  | =         | =      | =      | =      | =       | 70->79 | -0.12722 |
| = | =  | =         | =      | =      | =      | =       | 70->80 | -0.13342 |
| = | =  | =         | =      | =      | =      | =       | 71->79 | -0.10411 |
| = | =  | =         | =      | =      | =      | =       | 71->80 | 0.13765  |
| = | =  | =         | =      | =      | =      | =       | 76->81 | -0.12628 |
| = | =  | =         | =      | =      | =      | =       | 77->81 | -0.1535  |
| = | =  | =         | =      | =      | =      | =       | 77->82 | -0.20246 |
| = | =  | =         | =      | =      | =      | =       | 78->82 | 0.35089  |
| = | =  | =         | =      | =      | =      | =       | 78->83 | 0.41913  |
|   | 23 | Singlet-A | 0.0636 | 5.3604 | 231.3  | 43233.9 |        |          |
| = | =  | =         | =      | =      | =      | =       | 69->79 | 0.49239  |
| = | =  | =         | =      | =      | =      | =       | 78->82 | -0.10582 |
| = | =  | =         | =      | =      | =      | =       | 78->83 | 0.32375  |
| = | =  | =         | =      | =      | =      | =       | 78->84 | 0.32505  |
|   | 24 | Singlet-A | 0.0071 | 5.4471 | 227.62 | 43932.9 |        |          |
| = | =  | =         | =      | =      | =      | =       | 69->79 | 0.12343  |
| = | =  | =         | =      | =      | =      | =       | 70->80 | -0.2288  |
| = | =  | =         | =      | =      | =      | =       | 71->79 | -0.12522 |
| = | =  | =         | =      | =      | =      | =       | 72->81 | 0.12377  |
| = | =  | =         | =      | =      | =      | =       | 74->81 | -0.11148 |
| = | =  | =         | =      | =      | =      | =       | 75->81 | 0.1537   |
| = | =  | =         | =      | =      | =      | =       | 77->82 | 0.42448  |
| = | =  | =         | =      | =      | =      | =       | 77->83 | 0.23419  |
| = | =  | =         | =      | =      | =      | =       | 78->82 | 0.21707  |
|   | 25 | Singlet-A | 0.052  | 5.5299 | 224.21 | 44601   |        |          |
| = | =  | =         | =      | =      | =      | =       | 70->80 | -0.11563 |
| = | =  | =         | =      | =      | =      | =       | 71->80 | 0.10951  |
| = | =  | =         | =      | =      | =      | =       | 74->81 | -0.14142 |
| = | =  | =         | =      | =      | =      | =       | 77->81 | -0.12028 |
| = | =  | =         | =      | =      | =      | =       | 77->83 | -0.13045 |

|    |           |        |        |        |         |        |          |
|----|-----------|--------|--------|--------|---------|--------|----------|
| =  | =         | =      | =      | =      | =       | 78->82 | 0.18564  |
| =  | =         | =      | =      | =      | =       | 78->83 | -0.31492 |
| =  | =         | =      | =      | =      | =       | 78->84 | 0.49422  |
| 26 | Singlet-A | 0.0251 | 5.5552 | 223.19 | 44804.9 |        |          |
| =  | =         | =      | =      | =      | =       | 74->81 | -0.45535 |
| =  | =         | =      | =      | =      | =       | 75->81 | 0.47695  |
| =  | =         | =      | =      | =      | =       | 77->82 | -0.12072 |
| 27 | Singlet-A | 0.04   | 5.5797 | 222.2  | 45004.5 |        |          |
| =  | =         | =      | =      | =      | =       | 69->79 | 0.34729  |
| =  | =         | =      | =      | =      | =       | 70->81 | -0.12533 |
| =  | =         | =      | =      | =      | =       | 71->80 | 0.1437   |
| =  | =         | =      | =      | =      | =       | 72->81 | -0.10688 |
| =  | =         | =      | =      | =      | =       | 74->81 | 0.13302  |
| =  | =         | =      | =      | =      | =       | 77->82 | -0.2233  |
| =  | =         | =      | =      | =      | =       | 77->83 | 0.15176  |
| =  | =         | =      | =      | =      | =       | 78->82 | 0.13893  |
| =  | =         | =      | =      | =      | =       | 78->83 | -0.27888 |
| =  | =         | =      | =      | =      | =       | 78->84 | -0.26983 |
| 28 | Singlet-A | 0.024  | 5.7085 | 217.19 | 46042.6 |        |          |
| =  | =         | =      | =      | =      | =       | 69->79 | -0.1547  |
| =  | =         | =      | =      | =      | =       | 69->80 | 0.21708  |
| =  | =         | =      | =      | =      | =       | 74->81 | 0.24787  |
| =  | =         | =      | =      | =      | =       | 75->81 | 0.23625  |
| =  | =         | =      | =      | =      | =       | 77->83 | 0.44812  |
| =  | =         | =      | =      | =      | =       | 77->84 | 0.2033   |
| =  | =         | =      | =      | =      | =       | 78->84 | 0.16127  |
| 29 | Singlet-A | 0.028  | 5.7621 | 215.17 | 46474.9 |        |          |
| =  | =         | =      | =      | =      | =       | 69->80 | 0.35025  |
| =  | =         | =      | =      | =      | =       | 71->81 | -0.10347 |
| =  | =         | =      | =      | =      | =       | 72->81 | -0.11715 |
| =  | =         | =      | =      | =      | =       | 73->81 | 0.306    |
| =  | =         | =      | =      | =      | =       | 74->81 | -0.28466 |
| =  | =         | =      | =      | =      | =       | 75->81 | -0.31394 |
| =  | =         | =      | =      | =      | =       | 77->83 | 0.10109  |
| =  | =         | =      | =      | =      | =       | 77->84 | 0.176    |
| 30 | Singlet-A | 0.0053 | 5.8424 | 212.21 | 47123.1 |        |          |
| =  | =         | =      | =      | =      | =       | 69->80 | -0.30397 |
| =  | =         | =      | =      | =      | =       | 71->81 | 0.12919  |
| =  | =         | =      | =      | =      | =       | 72->81 | -0.24828 |
| =  | =         | =      | =      | =      | =       | 73->81 | 0.4536   |
| =  | =         | =      | =      | =      | =       | 77->83 | 0.10101  |
| =  | =         | =      | =      | =      | =       | 77->84 | -0.22006 |
| =  | =         | =      | =      | =      | =       | 78->84 | 0.1034   |



|    |           |        |        |        |         |        |          |
|----|-----------|--------|--------|--------|---------|--------|----------|
| 31 | Singlet-A | 0.0109 | 5.9026 | 210.05 | 47607.7 |        |          |
| =  | =         | =      | =      | =      | =       | 69->80 | 0.33316  |
| =  | =         | =      | =      | =      | =       | 70->81 | -0.11109 |
| =  | =         | =      | =      | =      | =       | 71->81 | -0.16848 |
| =  | =         | =      | =      | =      | =       | 72->81 | -0.12969 |
| =  | =         | =      | =      | =      | =       | 73->81 | 0.15893  |
| =  | =         | =      | =      | =      | =       | 74->81 | 0.24304  |
| =  | =         | =      | =      | =      | =       | 75->81 | 0.21898  |
| =  | =         | =      | =      | =      | =       | 77->82 | 0.10091  |
| =  | =         | =      | =      | =      | =       | 77->83 | -0.28118 |
| =  | =         | =      | =      | =      | =       | 77->84 | -0.20899 |
| 32 | Singlet-A | 0.0003 | 5.9367 | 208.84 | 47883.5 |        |          |
| =  | =         | =      | =      | =      | =       | 71->81 | 0.30346  |
| =  | =         | =      | =      | =      | =       | 73->81 | 0.18363  |
| =  | =         | =      | =      | =      | =       | 74->81 | 0.1079   |
| =  | =         | =      | =      | =      | =       | 76->82 | -0.24362 |
| =  | =         | =      | =      | =      | =       | 77->83 | -0.21827 |
| =  | =         | =      | =      | =      | =       | 77->84 | 0.44586  |
| 33 | Singlet-A | 0.021  | 6.0322 | 205.54 | 48652.3 |        |          |
| =  | =         | =      | =      | =      | =       | 71->81 | 0.13716  |
| =  | =         | =      | =      | =      | =       | 72->81 | 0.22634  |
| =  | =         | =      | =      | =      | =       | 73->81 | 0.13584  |
| =  | =         | =      | =      | =      | =       | 76->82 | 0.57305  |
| =  | =         | =      | =      | =      | =       | 76->83 | 0.15798  |
| 34 | Singlet-A | 0.0026 | 6.0609 | 204.56 | 48885.4 |        |          |
| =  | =         | =      | =      | =      | =       | 71->81 | 0.15204  |
| =  | =         | =      | =      | =      | =       | 78->85 | 0.65827  |
| =  | =         | =      | =      | =      | =       | 78->86 | 0.14247  |
| 35 | Singlet-A | 0.0002 | 6.0673 | 204.35 | 48935.6 |        |          |
| =  | =         | =      | =      | =      | =       | 68->79 | 0.70478  |
| 36 | Singlet-A | 0.1112 | 6.2027 | 199.89 | 50027.5 |        |          |
| =  | =         | =      | =      | =      | =       | 70->81 | -0.25049 |
| =  | =         | =      | =      | =      | =       | 71->81 | -0.10894 |
| =  | =         | =      | =      | =      | =       | 72->81 | 0.46334  |
| =  | =         | =      | =      | =      | =       | 73->81 | 0.22702  |
| =  | =         | =      | =      | =      | =       | 75->82 | -0.1194  |
| =  | =         | =      | =      | =      | =       | 76->82 | -0.16731 |
| =  | =         | =      | =      | =      | =       | 77->85 | -0.10264 |
| 37 | Singlet-A | 0.0061 | 6.225  | 199.17 | 50208.4 |        |          |
| =  | =         | =      | =      | =      | =       | 69->80 | -0.12165 |
| =  | =         | =      | =      | =      | =       | 70->81 | -0.20441 |
| =  | =         | =      | =      | =      | =       | 71->81 | -0.3157  |
| =  | =         | =      | =      | =      | =       | 72->81 | -0.16021 |

|   |    |           |        |        |        |         |          |
|---|----|-----------|--------|--------|--------|---------|----------|
| = | =  | =         | =      | =      | =      | 77->84  | 0.19295  |
| = | =  | =         | =      | =      | =      | 78->86  | 0.46425  |
|   | 38 | Singlet-A | 0.0007 | 6.2539 | 198.25 | 50441.4 |          |
| = | =  | =         | =      | =      | =      | 67->79  | 0.70122  |
|   | 39 | Singlet-A | 0.0216 | 6.3319 | 195.81 | 51069.9 |          |
| = | =  | =         | =      | =      | =      | 66->79  | -0.16541 |
| = | =  | =         | =      | =      | =      | 70->81  | -0.36082 |
| = | =  | =         | =      | =      | =      | 71->81  | 0.17988  |
| = | =  | =         | =      | =      | =      | 77->85  | 0.45855  |
| = | =  | =         | =      | =      | =      | 77->86  | 0.10933  |
|   | 40 | Singlet-A | 0.0004 | 6.3544 | 195.11 | 51253.1 |          |
| = | =  | =         | =      | =      | =      | 66->79  | 0.67949  |
| = | =  | =         | =      | =      | =      | 77->85  | 0.15139  |

### Corrole 5b in DCM

#### Coordinates:

|   |          |          |          |
|---|----------|----------|----------|
| C | 1.72543  | -4.22039 | 0.25338  |
| C | 2.91587  | -3.50035 | 0.3495   |
| C | 2.67299  | -2.17574 | -0.08027 |
| C | 0.73481  | -3.35225 | -0.23653 |
| C | -0.68283 | -3.34822 | -0.27118 |
| C | -2.63761 | -2.22811 | -0.18362 |
| C | -2.9226  | -3.61871 | -0.09866 |
| C | -1.71645 | -4.30654 | -0.15341 |
| C | 3.45126  | -0.98929 | -0.034   |
| C | 2.85588  | 0.28223  | -0.08435 |
| C | 3.48484  | 1.5523   | -0.26985 |
| C | 2.52173  | 2.52729  | -0.27013 |
| C | 1.24425  | 1.90553  | -0.10347 |
| C | -0.02297 | 2.50046  | -0.05063 |
| C | -1.26366 | 1.80913  | 0.0114   |
| C | -2.55398 | 2.46874  | -0.02126 |
| C | -3.4974  | 1.48982  | -0.0071  |
| C | -2.79104 | 0.22843  | 0.02777  |
| C | -3.40272 | -1.04567 | -0.03076 |
| N | 1.35152  | -2.14435 | -0.45304 |
| H | 0.98626  | -1.44016 | -1.07923 |
| N | -1.28675 | -2.13057 | -0.32669 |
| N | -1.43203 | 0.46127  | 0.04185  |
| N | 1.49511  | 0.55407  | -0.0154  |

|   |          |          |          |
|---|----------|----------|----------|
| H | 0.79606  | -0.06284 | 0.37517  |
| H | -2.71588 | 3.53711  | -0.06956 |
| H | -4.57117 | 1.61179  | -0.05751 |
| H | -3.90654 | -4.05281 | 0.01463  |
| H | -1.57791 | -5.37878 | -0.11301 |
| H | 1.55853  | -5.23704 | 0.58351  |
| H | 3.85053  | -3.85726 | 0.7601   |
| H | 4.5462   | 1.69146  | -0.42156 |
| H | 2.67635  | 3.58858  | -0.40396 |
| C | 4.91563  | -1.11378 | 0.11017  |
| C | 5.63104  | -2.0328  | -0.67367 |
| C | 5.62609  | -0.34149 | 1.04245  |
| C | 7.00852  | -2.16715 | -0.53681 |
| H | 5.09851  | -2.63141 | -1.40762 |
| C | 7.00445  | -0.47328 | 1.17464  |
| H | 5.08506  | 0.35022  | 1.6821   |
| C | 7.70197  | -1.38597 | 0.38573  |
| H | 7.5432   | -2.87925 | -1.15972 |
| H | 7.5335   | 0.13096  | 1.90672  |
| H | 8.77824  | -1.49034 | 0.49172  |
| C | -4.87138 | -1.17798 | 0.08236  |
| C | -5.59342 | -1.93773 | -0.85067 |
| C | -5.57515 | -0.57166 | 1.13387  |
| C | -6.97298 | -2.07977 | -0.73998 |
| H | -5.06535 | -2.40148 | -1.67951 |
| C | -6.95498 | -0.71291 | 1.24277  |
| H | -5.02691 | -0.00235 | 1.87928  |
| C | -7.65951 | -1.4671  | 0.30652  |
| H | -7.51422 | -2.66491 | -1.47871 |
| H | -7.48009 | -0.23952 | 2.06813  |
| H | -8.73695 | -1.57812 | 0.39287  |
| C | -0.06075 | 3.99146  | -0.09205 |
| C | -0.49634 | 4.72536  | 1.01854  |
| C | 0.33461  | 4.68967  | -1.23987 |
| C | -0.53537 | 6.11666  | 0.98295  |
| H | -0.80261 | 4.19531  | 1.91676  |
| C | 0.30021  | 6.08152  | -1.27541 |
| H | 0.66215  | 4.13193  | -2.1136  |
| C | -0.13539 | 6.79957  | -0.16394 |
| H | -0.87451 | 6.66837  | 1.8558   |
| H | 0.60776  | 6.60491  | -2.17693 |
| H | -0.16448 | 7.88547  | -0.19164 |
| H | -0.87891 | -1.19043 | -0.22782 |

### Frequencies:

|             |    |         |         |         |
|-------------|----|---------|---------|---------|
|             |    | 1       | 2       | 3       |
| Frequencies | -- | 21.3463 | 32.1696 | 40.2217 |

### TDDFT:

| Order | Symm      | f      | Energy_eV | Energy_nm | Energy_cm-1 | Transition | Coef     |
|-------|-----------|--------|-----------|-----------|-------------|------------|----------|
| 1     | Singlet-A | 0.3629 | 2.0513    | 604.42    | 16544.8     |            |          |
| =     | =         | =      | =         | =         | =           | 137->139   | 0.10699  |
| =     | =         | =      | =         | =         | =           | 137->140   | -0.24379 |
| =     | =         | =      | =         | =         | =           | 138->139   | 0.64166  |
| =     | =         | =      | =         | =         | =           | 138->140   | 0.12785  |
| 2     | Singlet-A | 0.0335 | 2.185     | 567.44    | 17623       |            |          |
| =     | =         | =      | =         | =         | =           | 137->139   | 0.45768  |
| =     | =         | =      | =         | =         | =           | 138->139   | -0.1575  |
| =     | =         | =      | =         | =         | =           | 138->140   | 0.5054   |
| 3     | Singlet-A | 0.8268 | 2.8663    | 432.56    | 23118.2     |            |          |
| =     | =         | =      | =         | =         | =           | 135->139   | -0.10599 |
| =     | =         | =      | =         | =         | =           | 137->139   | 0.48835  |
| =     | =         | =      | =         | =         | =           | 137->140   | -0.11139 |
| =     | =         | =      | =         | =         | =           | 138->140   | -0.43719 |
| =     | =         | =      | =         | =         | =           | 138->141   | -0.12821 |
| 4     | Singlet-A | 0.5274 | 2.9709    | 417.32    | 23962.4     |            |          |
| =     | =         | =      | =         | =         | =           | 136->139   | 0.47743  |
| =     | =         | =      | =         | =         | =           | 137->140   | -0.46275 |
| =     | =         | =      | =         | =         | =           | 138->139   | -0.17361 |
| 5     | Singlet-A | 0.6977 | 3.0203    | 410.51    | 24359.9     |            |          |
| =     | =         | =      | =         | =         | =           | 136->139   | 0.50527  |
| =     | =         | =      | =         | =         | =           | 137->139   | 0.10353  |
| =     | =         | =      | =         | =         | =           | 137->140   | 0.4165   |
| =     | =         | =      | =         | =         | =           | 138->139   | 0.16089  |
| 6     | Singlet-A | 0.1018 | 3.247     | 381.84    | 26189       |            |          |
| =     | =         | =      | =         | =         | =           | 134->139   | -0.22059 |
| =     | =         | =      | =         | =         | =           | 135->139   | 0.60217  |
| =     | =         | =      | =         | =         | =           | 138->140   | -0.10842 |
| =     | =         | =      | =         | =         | =           | 138->141   | 0.21932  |
| 7     | Singlet-A | 0.0414 | 3.3333    | 371.96    | 26884.6     |            |          |
| =     | =         | =      | =         | =         | =           | 134->139   | 0.59638  |
| =     | =         | =      | =         | =         | =           | 138->141   | 0.30666  |
| 8     | Singlet-A | 0.0029 | 3.3897    | 365.77    | 27339.6     |            |          |

|   |    |           |        |        |        |          |          |
|---|----|-----------|--------|--------|--------|----------|----------|
| = | =  | =         | =      | =      | =      | 130->139 | 0.15141  |
| = | =  | =         | =      | =      | =      | 134->139 | -0.10151 |
| = | =  | =         | =      | =      | =      | 135->139 | -0.11379 |
| = | =  | =         | =      | =      | =      | 138->141 | 0.24776  |
| = | =  | =         | =      | =      | =      | 138->142 | 0.61136  |
|   | 9  | Singlet-A | 0.0009 | 3.4209 | 362.43 | 27591.5  |          |
| = | =  | =         | =      | =      | =      | 129->139 | 0.1405   |
| = | =  | =         | =      | =      | =      | 133->139 | -0.11053 |
| = | =  | =         | =      | =      | =      | 134->139 | -0.11427 |
| = | =  | =         | =      | =      | =      | 135->139 | -0.1446  |
| = | =  | =         | =      | =      | =      | 138->141 | 0.28989  |
| = | =  | =         | =      | =      | =      | 138->142 | -0.21175 |
| = | =  | =         | =      | =      | =      | 138->143 | 0.44915  |
| = | =  | =         | =      | =      | =      | 138->144 | -0.19335 |
| = | =  | =         | =      | =      | =      | 138->145 | 0.1989   |
|   | 10 | Singlet-A | 0.0161 | 3.4251 | 361.99 | 27625.1  |          |
| = | =  | =         | =      | =      | =      | 129->139 | -0.10875 |
| = | =  | =         | =      | =      | =      | 131->139 | -0.2015  |
| = | =  | =         | =      | =      | =      | 132->139 | 0.10237  |
| = | =  | =         | =      | =      | =      | 133->139 | 0.10557  |
| = | =  | =         | =      | =      | =      | 134->139 | 0.103    |
| = | =  | =         | =      | =      | =      | 138->141 | -0.15464 |
| = | =  | =         | =      | =      | =      | 138->142 | 0.13532  |
| = | =  | =         | =      | =      | =      | 138->143 | 0.34925  |
| = | =  | =         | =      | =      | =      | 138->144 | 0.45382  |
| = | =  | =         | =      | =      | =      | 138->145 | 0.16004  |
|   | 11 | Singlet-A | 0.0017 | 3.4294 | 361.54 | 27659.5  |          |
| = | =  | =         | =      | =      | =      | 130->139 | 0.11791  |
| = | =  | =         | =      | =      | =      | 131->139 | 0.16804  |
| = | =  | =         | =      | =      | =      | 132->139 | 0.45976  |
| = | =  | =         | =      | =      | =      | 133->139 | 0.34055  |
| = | =  | =         | =      | =      | =      | 136->140 | 0.10191  |
| = | =  | =         | =      | =      | =      | 138->141 | 0.21139  |
| = | =  | =         | =      | =      | =      | 138->143 | -0.15089 |
| = | =  | =         | =      | =      | =      | 138->144 | 0.13295  |
|   | 12 | Singlet-A | 0.0144 | 3.4406 | 360.36 | 27750    |          |
| = | =  | =         | =      | =      | =      | 131->139 | -0.21531 |
| = | =  | =         | =      | =      | =      | 136->140 | -0.20871 |
| = | =  | =         | =      | =      | =      | 138->143 | -0.2642  |
| = | =  | =         | =      | =      | =      | 138->145 | 0.55431  |
|   | 13 | Singlet-A | 0.0065 | 3.4499 | 359.39 | 27824.9  |          |
| = | =  | =         | =      | =      | =      | 133->139 | 0.43199  |
| = | =  | =         | =      | =      | =      | 134->139 | 0.14248  |

|    |           |        |        |        |         |          |          |
|----|-----------|--------|--------|--------|---------|----------|----------|
| =  | =         | =      | =      | =      | =       | 135->139 | 0.14994  |
| =  | =         | =      | =      | =      | =       | 136->140 | 0.11448  |
| =  | =         | =      | =      | =      | =       | 138->141 | -0.16211 |
| =  | =         | =      | =      | =      | =       | 138->142 | 0.12825  |
| =  | =         | =      | =      | =      | =       | 138->143 | 0.17362  |
| =  | =         | =      | =      | =      | =       | 138->144 | -0.38616 |
| =  | =         | =      | =      | =      | =       | 138->146 | -0.11901 |
| 14 | Singlet-A | 0.0446 | 3.4711 | 357.19 | 27996.3 |          |          |
| =  | =         | =      | =      | =      | =       | 131->139 | -0.22253 |
| =  | =         | =      | =      | =      | =       | 133->139 | -0.17033 |
| =  | =         | =      | =      | =      | =       | 136->140 | 0.53722  |
| =  | =         | =      | =      | =      | =       | 138->146 | -0.29981 |
| 15 | Singlet-A | 0.0084 | 3.4986 | 354.38 | 28218.3 |          |          |
| =  | =         | =      | =      | =      | =       | 129->139 | -0.14755 |
| =  | =         | =      | =      | =      | =       | 131->139 | 0.52669  |
| =  | =         | =      | =      | =      | =       | 132->139 | -0.13534 |
| =  | =         | =      | =      | =      | =       | 138->144 | 0.11693  |
| =  | =         | =      | =      | =      | =       | 138->145 | 0.2739   |
| =  | =         | =      | =      | =      | =       | 138->146 | -0.23103 |
| 16 | Singlet-A | 0.0335 | 3.5122 | 353.01 | 28327.8 |          |          |
| =  | =         | =      | =      | =      | =       | 129->139 | 0.16737  |
| =  | =         | =      | =      | =      | =       | 130->139 | 0.17223  |
| =  | =         | =      | =      | =      | =       | 132->139 | -0.32966 |
| =  | =         | =      | =      | =      | =       | 133->139 | 0.13763  |
| =  | =         | =      | =      | =      | =       | 136->140 | 0.29339  |
| =  | =         | =      | =      | =      | =       | 138->145 | 0.13103  |
| =  | =         | =      | =      | =      | =       | 138->146 | 0.40738  |
| 17 | Singlet-A | 0.0072 | 3.5369 | 350.54 | 28527.4 |          |          |
| =  | =         | =      | =      | =      | =       | 129->139 | -0.10609 |
| =  | =         | =      | =      | =      | =       | 130->139 | 0.55683  |
| =  | =         | =      | =      | =      | =       | 131->139 | 0.12147  |
| =  | =         | =      | =      | =      | =       | 132->139 | 0.15183  |
| =  | =         | =      | =      | =      | =       | 133->139 | -0.19379 |
| =  | =         | =      | =      | =      | =       | 138->141 | -0.14171 |
| =  | =         | =      | =      | =      | =       | 138->143 | 0.10965  |
| =  | =         | =      | =      | =      | =       | 138->144 | -0.14148 |
| 18 | Singlet-A | 0.0037 | 3.5488 | 349.37 | 28622.9 |          |          |
| =  | =         | =      | =      | =      | =       | 128->139 | -0.14678 |
| =  | =         | =      | =      | =      | =       | 129->139 | 0.22209  |
| =  | =         | =      | =      | =      | =       | 130->139 | -0.26462 |
| =  | =         | =      | =      | =      | =       | 131->139 | 0.1255   |
| =  | =         | =      | =      | =      | =       | 132->139 | 0.29633  |
| =  | =         | =      | =      | =      | =       | 133->139 | -0.21409 |

|    |           |        |        |        |         |          |          |
|----|-----------|--------|--------|--------|---------|----------|----------|
| =  | =         | =      | =      | =      | =       | 138->141 | -0.17745 |
| =  | =         | =      | =      | =      | =       | 138->142 | 0.15373  |
| =  | =         | =      | =      | =      | =       | 138->145 | 0.112    |
| =  | =         | =      | =      | =      | =       | 138->146 | 0.27338  |
| 19 | Singlet-A | 0.0156 | 3.6273 | 341.81 | 29256   |          |          |
| =  | =         | =      | =      | =      | =       | 128->139 | -0.1093  |
| =  | =         | =      | =      | =      | =       | 129->139 | 0.4368   |
| =  | =         | =      | =      | =      | =       | 135->140 | 0.42069  |
| =  | =         | =      | =      | =      | =       | 137->141 | -0.20117 |
| =  | =         | =      | =      | =      | =       | 138->146 | -0.15791 |
| 20 | Singlet-A | 0.0213 | 3.6732 | 337.54 | 29626.1 |          |          |
| =  | =         | =      | =      | =      | =       | 128->139 | 0.55306  |
| =  | =         | =      | =      | =      | =       | 129->139 | -0.12465 |
| =  | =         | =      | =      | =      | =       | 132->139 | 0.12963  |
| =  | =         | =      | =      | =      | =       | 133->139 | -0.1285  |
| =  | =         | =      | =      | =      | =       | 135->140 | 0.29466  |
| =  | =         | =      | =      | =      | =       | 138->147 | -0.1162  |
| 21 | Singlet-A | 0.0236 | 3.7332 | 332.12 | 30109.6 |          |          |
| =  | =         | =      | =      | =      | =       | 128->139 | -0.22584 |
| =  | =         | =      | =      | =      | =       | 129->139 | -0.21469 |
| =  | =         | =      | =      | =      | =       | 134->140 | -0.25146 |
| =  | =         | =      | =      | =      | =       | 135->140 | 0.38278  |
| =  | =         | =      | =      | =      | =       | 137->141 | 0.28847  |
| =  | =         | =      | =      | =      | =       | 138->146 | 0.11224  |
| =  | =         | =      | =      | =      | =       | 138->147 | 0.17642  |
| 22 | Singlet-A | 0.045  | 3.7755 | 328.39 | 30451.6 |          |          |
| =  | =         | =      | =      | =      | =       | 127->139 | 0.1096   |
| =  | =         | =      | =      | =      | =       | 128->139 | -0.10867 |
| =  | =         | =      | =      | =      | =       | 134->140 | 0.52534  |
| =  | =         | =      | =      | =      | =       | 135->140 | 0.10777  |
| =  | =         | =      | =      | =      | =       | 137->141 | 0.30717  |
| =  | =         | =      | =      | =      | =       | 138->147 | -0.23509 |
| 23 | Singlet-A | 0.0069 | 3.7958 | 326.63 | 30615.7 |          |          |
| =  | =         | =      | =      | =      | =       | 127->139 | 0.52072  |
| =  | =         | =      | =      | =      | =       | 134->140 | -0.22909 |
| =  | =         | =      | =      | =      | =       | 137->141 | 0.12783  |
| =  | =         | =      | =      | =      | =       | 137->142 | 0.33436  |
| 24 | Singlet-A | 0.0188 | 3.8024 | 326.07 | 30668.3 |          |          |
| =  | =         | =      | =      | =      | =       | 127->139 | -0.29324 |
| =  | =         | =      | =      | =      | =       | 128->139 | 0.15069  |
| =  | =         | =      | =      | =      | =       | 133->140 | 0.18292  |
| =  | =         | =      | =      | =      | =       | 137->141 | 0.21769  |
| =  | =         | =      | =      | =      | =       | 137->142 | 0.44657  |

|   |    |           |        |        |        |         |          |          |
|---|----|-----------|--------|--------|--------|---------|----------|----------|
| = | =  | =         | =      | =      | =      | =       | 138->147 | 0.25226  |
|   | 25 | Singlet-A | 0.0187 | 3.8204 | 324.53 | 30813.8 |          |          |
| = | =  | =         | =      | =      | =      | =       | 125->139 | -0.11361 |
| = | =  | =         | =      | =      | =      | =       | 126->139 | 0.32475  |
| = | =  | =         | =      | =      | =      | =       | 127->139 | 0.21019  |
| = | =  | =         | =      | =      | =      | =       | 134->140 | 0.19221  |
| = | =  | =         | =      | =      | =      | =       | 137->142 | -0.12787 |
| = | =  | =         | =      | =      | =      | =       | 137->143 | 0.18114  |
| = | =  | =         | =      | =      | =      | =       | 138->147 | 0.43138  |
|   | 26 | Singlet-A | 0.0056 | 3.8403 | 322.85 | 30974.1 |          |          |
| = | =  | =         | =      | =      | =      | =       | 126->139 | 0.10629  |
| = | =  | =         | =      | =      | =      | =       | 127->139 | -0.10462 |
| = | =  | =         | =      | =      | =      | =       | 129->139 | -0.14171 |
| = | =  | =         | =      | =      | =      | =       | 132->140 | -0.11505 |
| = | =  | =         | =      | =      | =      | =       | 133->140 | -0.15267 |
| = | =  | =         | =      | =      | =      | =       | 137->141 | -0.28556 |
| = | =  | =         | =      | =      | =      | =       | 137->142 | 0.37112  |
| = | =  | =         | =      | =      | =      | =       | 137->143 | 0.14849  |
| = | =  | =         | =      | =      | =      | =       | 137->144 | -0.18064 |
| = | =  | =         | =      | =      | =      | =       | 137->145 | -0.3013  |
|   | 27 | Singlet-A | 0.007  | 3.8497 | 322.06 | 31050.1 |          |          |
| = | =  | =         | =      | =      | =      | =       | 126->139 | -0.13008 |
| = | =  | =         | =      | =      | =      | =       | 132->140 | 0.169    |
| = | =  | =         | =      | =      | =      | =       | 133->140 | 0.14563  |
| = | =  | =         | =      | =      | =      | =       | 134->140 | -0.10756 |
| = | =  | =         | =      | =      | =      | =       | 137->143 | 0.59886  |
| = | =  | =         | =      | =      | =      | =       | 137->144 | -0.16571 |
| = | =  | =         | =      | =      | =      | =       | 137->145 | 0.13183  |
|   | 28 | Singlet-A | 0.0209 | 3.854  | 321.7  | 31084.9 |          |          |
| = | =  | =         | =      | =      | =      | =       | 132->140 | -0.21711 |
| = | =  | =         | =      | =      | =      | =       | 133->140 | -0.29314 |
| = | =  | =         | =      | =      | =      | =       | 137->143 | 0.25016  |
| = | =  | =         | =      | =      | =      | =       | 137->144 | 0.50865  |
| = | =  | =         | =      | =      | =      | =       | 137->145 | 0.13409  |
|   | 29 | Singlet-A | 0.0011 | 3.8615 | 321.07 | 31145.9 |          |          |
| = | =  | =         | =      | =      | =      | =       | 126->139 | 0.52011  |
| = | =  | =         | =      | =      | =      | =       | 132->140 | 0.12381  |
| = | =  | =         | =      | =      | =      | =       | 133->140 | 0.24378  |
| = | =  | =         | =      | =      | =      | =       | 137->144 | 0.21521  |
| = | =  | =         | =      | =      | =      | =       | 137->145 | 0.10376  |
| = | =  | =         | =      | =      | =      | =       | 138->147 | -0.22304 |
|   | 30 | Singlet-A | 0.03   | 3.8731 | 320.11 | 31239.3 |          |          |
| = | =  | =         | =      | =      | =      | =       | 126->139 | 0.11221  |



|   |   |   |   |   |   |          |          |
|---|---|---|---|---|---|----------|----------|
| = | = | = | = | = | = | 132->140 | -0.23417 |
| = | = | = | = | = | = | 133->140 | -0.20418 |
| = | = | = | = | = | = | 137->144 | -0.29317 |
| = | = | = | = | = | = | 137->145 | 0.50464  |
| = | = | = | = | = | = | 137->146 | -0.15469 |

### Corrole 5b in DMF

#### Coordinates:

|   |          |          |          |
|---|----------|----------|----------|
| C | 1.72398  | -4.21959 | 0.25754  |
| C | 2.91452  | -3.4998  | 0.35323  |
| C | 2.67266  | -2.176   | -0.08022 |
| C | 0.73449  | -3.35195 | -0.23599 |
| C | -0.68304 | -3.34794 | -0.27142 |
| C | -2.63809 | -2.22774 | -0.18466 |
| C | -2.92267 | -3.61855 | -0.09672 |
| C | -1.71648 | -4.30633 | -0.1509  |
| C | 3.45128  | -0.98985 | -0.03487 |
| C | 2.85605  | 0.28194  | -0.08621 |
| C | 3.48544  | 1.5519   | -0.27136 |
| C | 2.52252  | 2.52715  | -0.27137 |
| C | 1.24483  | 1.90552  | -0.10463 |
| C | -0.02247 | 2.50107  | -0.05137 |
| C | -1.26348 | 1.81015  | 0.01046  |
| C | -2.55375 | 2.46972  | -0.0214  |
| C | -3.49755 | 1.49075  | -0.00771 |
| C | -2.79161 | 0.22917  | 0.02592  |
| C | -3.40344 | -1.04531 | -0.03227 |
| N | 1.35157  | -2.14454 | -0.45459 |
| H | 0.98964  | -1.44493 | -1.08794 |
| N | -1.28722 | -2.13039 | -0.3292  |
| N | -1.43241 | 0.46197  | 0.03998  |
| N | 1.4956   | 0.55426  | -0.01665 |
| H | 0.79581  | -0.06452 | 0.36943  |
| H | -2.71623 | 3.53813  | -0.06748 |
| H | -4.5713  | 1.6137   | -0.05646 |
| H | -3.90629 | -4.05327 | 0.01722  |
| H | -1.57746 | -5.37842 | -0.10816 |
| H | 1.55614  | -5.23547 | 0.58956  |
| H | 3.8484   | -3.85667 | 0.76567  |

|   |          |          |          |
|---|----------|----------|----------|
| H | 4.5468   | 1.69154  | -0.42258 |
| H | 2.67802  | 3.58825  | -0.40561 |
| C | 4.91562  | -1.11478 | 0.10991  |
| C | 5.6303   | -2.0364  | -0.67179 |
| C | 5.62661  | -0.34063 | 1.04042  |
| C | 7.00778  | -2.17148 | -0.53453 |
| H | 5.09766  | -2.63654 | -1.40439 |
| C | 7.00496  | -0.47322 | 1.17301  |
| H | 5.0866   | 0.35343  | 1.67838  |
| C | 7.7018   | -1.38851 | 0.38626  |
| H | 7.54189  | -2.88558 | -1.15557 |
| H | 7.53447  | 0.13251  | 1.90348  |
| H | 8.77796  | -1.49348 | 0.49256  |
| C | -4.87213 | -1.17774 | 0.08155  |
| C | -5.59403 | -1.94093 | -0.84904 |
| C | -5.57632 | -0.56841 | 1.13127  |
| C | -6.97362 | -2.08335 | -0.73775 |
| H | -5.06625 | -2.40783 | -1.67629 |
| C | -6.95619 | -0.70986 | 1.2407   |
| H | -5.02891 | 0.00367  | 1.8752   |
| C | -7.66049 | -1.46748 | 0.30683  |
| H | -7.51443 | -2.67152 | -1.47432 |
| H | -7.48141 | -0.23399 | 2.06452  |
| H | -8.73782 | -1.57879 | 0.39364  |
| C | -0.05982 | 3.9922   | -0.09178 |
| C | -0.49765 | 4.72546  | 1.01856  |
| C | 0.33827  | 4.69136  | -1.23825 |
| C | -0.5363  | 6.11691  | 0.98403  |
| H | -0.80596 | 4.19527  | 1.91602  |
| C | 0.30423  | 6.08336  | -1.27277 |
| H | 0.66842  | 4.1348   | -2.11177 |
| C | -0.13372 | 6.80071  | -0.16159 |
| H | -0.87712 | 6.66794  | 1.85663  |
| H | 0.61427  | 6.60731  | -2.17305 |
| H | -0.16237 | 7.88662  | -0.18845 |
| H | -0.87847 | -1.19053 | -0.23365 |

**Frequencies:**

|             |    |         |         |         |
|-------------|----|---------|---------|---------|
|             |    | 1       | 2       | 3       |
| Frequencies | -- | 21.2902 | 32.0763 | 40.0071 |

**TDDFT:**

| Order | Symm      | f      | Energy_eV | Energy_nm | Energy_cm-1 | Transition | Coef     |
|-------|-----------|--------|-----------|-----------|-------------|------------|----------|
| 1     | Singlet-A | 0.3627 | 2.0488    | 605.15    | 16524.8     |            |          |
| =     | =         | =      | =         | =         | =           | 137->139   | 0.10457  |
| =     | =         | =      | =         | =         | =           | 137->140   | 0.24461  |
| =     | =         | =      | =         | =         | =           | 138->139   | 0.64204  |
| =     | =         | =      | =         | =         | =           | 138->140   | -0.12642 |
| 2     | Singlet-A | 0.033  | 2.1844    | 567.6     | 17618       |            |          |
| =     | =         | =      | =         | =         | =           | 137->139   | -0.45553 |
| =     | =         | =      | =         | =         | =           | 138->139   | 0.15499  |
| =     | =         | =      | =         | =         | =           | 138->140   | 0.50817  |
| 3     | Singlet-A | 0.8333 | 2.8645    | 432.82    | 23104.3     |            |          |
| =     | =         | =      | =         | =         | =           | 135->139   | -0.107   |
| =     | =         | =      | =         | =         | =           | 137->139   | 0.49204  |
| =     | =         | =      | =         | =         | =           | 137->140   | 0.11187  |
| =     | =         | =      | =         | =         | =           | 138->140   | 0.43574  |
| =     | =         | =      | =         | =         | =           | 138->141   | -0.1296  |
| 4     | Singlet-A | 0.751  | 2.9743    | 416.85    | 23989.4     |            |          |
| =     | =         | =      | =         | =         | =           | 136->139   | 0.37608  |
| =     | =         | =      | =         | =         | =           | 137->140   | 0.53098  |
| =     | =         | =      | =         | =         | =           | 138->139   | -0.20075 |
| 5     | Singlet-A | 0.4791 | 3.0277    | 409.51    | 24419.4     |            |          |
| =     | =         | =      | =         | =         | =           | 136->139   | 0.58589  |
| =     | =         | =      | =         | =         | =           | 137->140   | -0.32552 |
| =     | =         | =      | =         | =         | =           | 138->139   | 0.1274   |
| 6     | Singlet-A | 0.1022 | 3.2476    | 381.77    | 26193.8     |            |          |
| =     | =         | =      | =         | =         | =           | 134->139   | -0.2253  |
| =     | =         | =      | =         | =         | =           | 135->139   | 0.60266  |
| =     | =         | =      | =         | =         | =           | 138->140   | 0.10745  |
| =     | =         | =      | =         | =         | =           | 138->141   | 0.21478  |
| 7     | Singlet-A | 0.0414 | 3.3319    | 372.11    | 26873.8     |            |          |
| =     | =         | =      | =         | =         | =           | 134->139   | 0.60736  |
| =     | =         | =      | =         | =         | =           | 138->141   | 0.28232  |
| 8     | Singlet-A | 0.0025 | 3.4004    | 364.62    | 27425.8     |            |          |
| =     | =         | =      | =         | =         | =           | 130->139   | -0.14857 |
| =     | =         | =      | =         | =         | =           | 135->139   | 0.12312  |
| =     | =         | =      | =         | =         | =           | 138->141   | -0.28877 |
| =     | =         | =      | =         | =         | =           | 138->142   | 0.58365  |
| 9     | Singlet-A | 0.006  | 3.4239    | 362.11    | 27615.9     |            |          |
| =     | =         | =      | =         | =         | =           | 131->139   | -0.18073 |
| =     | =         | =      | =         | =         | =           | 132->139   | 0.18353  |
| =     | =         | =      | =         | =         | =           | 138->141   | 0.1519   |

|    |           |        |        |        |         |          |          |
|----|-----------|--------|--------|--------|---------|----------|----------|
| =  | =         | =      | =      | =      | =       | 138->143 | 0.56695  |
| =  | =         | =      | =      | =      | =       | 138->145 | -0.24486 |
| 10 | Singlet-A | 0.0035 | 3.4278 | 361.71 | 27646.5 |          |          |
| =  | =         | =      | =      | =      | =       | 130->139 | 0.20946  |
| =  | =         | =      | =      | =      | =       | 131->139 | 0.12757  |
| =  | =         | =      | =      | =      | =       | 132->139 | 0.34762  |
| =  | =         | =      | =      | =      | =       | 133->139 | 0.38398  |
| =  | =         | =      | =      | =      | =       | 138->144 | -0.38166 |
| 11 | Singlet-A | 0.0069 | 3.4305 | 361.42 | 27668.6 |          |          |
| =  | =         | =      | =      | =      | =       | 129->139 | 0.16965  |
| =  | =         | =      | =      | =      | =       | 131->139 | 0.21968  |
| =  | =         | =      | =      | =      | =       | 132->139 | 0.22225  |
| =  | =         | =      | =      | =      | =       | 134->139 | -0.13789 |
| =  | =         | =      | =      | =      | =       | 135->139 | -0.13206 |
| =  | =         | =      | =      | =      | =       | 138->141 | 0.32763  |
| =  | =         | =      | =      | =      | =       | 138->142 | 0.21254  |
| =  | =         | =      | =      | =      | =       | 138->143 | -0.1518  |
| =  | =         | =      | =      | =      | =       | 138->144 | 0.36028  |
| 12 | Singlet-A | 0.0123 | 3.4423 | 360.18 | 27763.9 |          |          |
| =  | =         | =      | =      | =      | =       | 130->139 | -0.11817 |
| =  | =         | =      | =      | =      | =       | 131->139 | 0.19403  |
| =  | =         | =      | =      | =      | =       | 136->140 | -0.1675  |
| =  | =         | =      | =      | =      | =       | 138->143 | 0.26974  |
| =  | =         | =      | =      | =      | =       | 138->145 | 0.56272  |
| =  | =         | =      | =      | =      | =       | 138->146 | -0.10819 |
| 13 | Singlet-A | 0.0059 | 3.4516 | 359.2  | 27839.6 |          |          |
| =  | =         | =      | =      | =      | =       | 133->139 | 0.42401  |
| =  | =         | =      | =      | =      | =       | 134->139 | 0.14788  |
| =  | =         | =      | =      | =      | =       | 135->139 | 0.16183  |
| =  | =         | =      | =      | =      | =       | 138->141 | -0.18794 |
| =  | =         | =      | =      | =      | =       | 138->142 | -0.21145 |
| =  | =         | =      | =      | =      | =       | 138->143 | 0.11836  |
| =  | =         | =      | =      | =      | =       | 138->144 | 0.37369  |
| 14 | Singlet-A | 0.0405 | 3.4775 | 356.54 | 28047.3 |          |          |
| =  | =         | =      | =      | =      | =       | 131->139 | 0.2512   |
| =  | =         | =      | =      | =      | =       | 133->139 | 0.13469  |
| =  | =         | =      | =      | =      | =       | 136->140 | 0.52481  |
| =  | =         | =      | =      | =      | =       | 138->146 | -0.31252 |
| 15 | Singlet-A | 0.0117 | 3.4993 | 354.31 | 28223.9 |          |          |
| =  | =         | =      | =      | =      | =       | 129->139 | -0.16757 |
| =  | =         | =      | =      | =      | =       | 130->139 | -0.14008 |
| =  | =         | =      | =      | =      | =       | 131->139 | 0.49007  |
| =  | =         | =      | =      | =      | =       | 132->139 | -0.14386 |

|    |           |        |        |        |         |          |          |
|----|-----------|--------|--------|--------|---------|----------|----------|
| =  | =         | =      | =      | =      | =       | 136->140 | -0.13001 |
| =  | =         | =      | =      | =      | =       | 138->143 | 0.11563  |
| =  | =         | =      | =      | =      | =       | 138->144 | -0.1023  |
| =  | =         | =      | =      | =      | =       | 138->145 | -0.26824 |
| =  | =         | =      | =      | =      | =       | 138->146 | 0.2496   |
| 16 | Singlet-A | 0.0313 | 3.5126 | 352.97 | 28331   |          |          |
| =  | =         | =      | =      | =      | =       | 129->139 | -0.16014 |
| =  | =         | =      | =      | =      | =       | 130->139 | -0.26835 |
| =  | =         | =      | =      | =      | =       | 132->139 | 0.33289  |
| =  | =         | =      | =      | =      | =       | 136->140 | 0.31087  |
| =  | =         | =      | =      | =      | =       | 138->142 | -0.11596 |
| =  | =         | =      | =      | =      | =       | 138->146 | 0.36137  |
| 17 | Singlet-A | 0.0139 | 3.5293 | 351.3  | 28465.7 |          |          |
| =  | =         | =      | =      | =      | =       | 129->139 | -0.19101 |
| =  | =         | =      | =      | =      | =       | 130->139 | 0.55053  |
| =  | =         | =      | =      | =      | =       | 133->139 | -0.13775 |
| =  | =         | =      | =      | =      | =       | 136->140 | 0.11185  |
| =  | =         | =      | =      | =      | =       | 138->142 | 0.10364  |
| =  | =         | =      | =      | =      | =       | 138->143 | 0.1271   |
| =  | =         | =      | =      | =      | =       | 138->144 | 0.15631  |
| =  | =         | =      | =      | =      | =       | 138->146 | 0.16002  |
| 18 | Singlet-A | 0.0018 | 3.5465 | 349.6  | 28604.1 |          |          |
| =  | =         | =      | =      | =      | =       | 128->139 | 0.16596  |
| =  | =         | =      | =      | =      | =       | 129->139 | 0.16142  |
| =  | =         | =      | =      | =      | =       | 131->139 | 0.17001  |
| =  | =         | =      | =      | =      | =       | 132->139 | 0.33666  |
| =  | =         | =      | =      | =      | =       | 133->139 | -0.26583 |
| =  | =         | =      | =      | =      | =       | 135->139 | 0.1228   |
| =  | =         | =      | =      | =      | =       | 138->141 | -0.23284 |
| =  | =         | =      | =      | =      | =       | 138->142 | -0.14624 |
| =  | =         | =      | =      | =      | =       | 138->144 | 0.10348  |
| =  | =         | =      | =      | =      | =       | 138->145 | -0.1066  |
| =  | =         | =      | =      | =      | =       | 138->146 | -0.25419 |
| 19 | Singlet-A | 0.0119 | 3.6227 | 342.25 | 29218.4 |          |          |
| =  | =         | =      | =      | =      | =       | 129->139 | -0.41448 |
| =  | =         | =      | =      | =      | =       | 135->140 | 0.45177  |
| =  | =         | =      | =      | =      | =       | 137->141 | 0.19064  |
| =  | =         | =      | =      | =      | =       | 138->146 | -0.1699  |
| 20 | Singlet-A | 0.0253 | 3.674  | 337.47 | 29632.3 |          |          |
| =  | =         | =      | =      | =      | =       | 128->139 | 0.55872  |
| =  | =         | =      | =      | =      | =       | 129->139 | 0.14651  |
| =  | =         | =      | =      | =      | =       | 132->139 | -0.13431 |
| =  | =         | =      | =      | =      | =       | 133->139 | 0.12503  |

|    |           |        |        |        |         |          |          |
|----|-----------|--------|--------|--------|---------|----------|----------|
| =  | =         | =      | =      | =      | =       | 135->140 | 0.27386  |
| =  | =         | =      | =      | =      | =       | 138->147 | -0.11323 |
| 21 | Singlet-A | 0.0196 | 3.7322 | 332.2  | 30102.3 |          |          |
| =  | =         | =      | =      | =      | =       | 128->139 | -0.22928 |
| =  | =         | =      | =      | =      | =       | 129->139 | 0.22589  |
| =  | =         | =      | =      | =      | =       | 134->140 | -0.28913 |
| =  | =         | =      | =      | =      | =       | 135->140 | 0.36048  |
| =  | =         | =      | =      | =      | =       | 137->141 | -0.26209 |
| =  | =         | =      | =      | =      | =       | 138->146 | 0.122    |
| =  | =         | =      | =      | =      | =       | 138->147 | 0.1741   |
| 22 | Singlet-A | 0.0409 | 3.7728 | 328.63 | 30429.4 |          |          |
| =  | =         | =      | =      | =      | =       | 128->139 | -0.1373  |
| =  | =         | =      | =      | =      | =       | 129->139 | 0.10286  |
| =  | =         | =      | =      | =      | =       | 134->140 | 0.54381  |
| =  | =         | =      | =      | =      | =       | 135->140 | 0.13088  |
| =  | =         | =      | =      | =      | =       | 137->141 | -0.26486 |
| =  | =         | =      | =      | =      | =       | 138->147 | -0.20853 |
| 23 | Singlet-A | 0.0178 | 3.7915 | 327    | 30581   |          |          |
| =  | =         | =      | =      | =      | =       | 127->139 | 0.62231  |
| =  | =         | =      | =      | =      | =       | 133->140 | 0.14447  |
| =  | =         | =      | =      | =      | =       | 134->140 | 0.16246  |
| =  | =         | =      | =      | =      | =       | 138->147 | 0.12485  |
| 24 | Singlet-A | 0.0035 | 3.8116 | 325.28 | 30742.7 |          |          |
| =  | =         | =      | =      | =      | =       | 126->139 | -0.17436 |
| =  | =         | =      | =      | =      | =       | 128->139 | 0.10616  |
| =  | =         | =      | =      | =      | =       | 129->139 | -0.10907 |
| =  | =         | =      | =      | =      | =       | 130->140 | 0.10587  |
| =  | =         | =      | =      | =      | =       | 133->140 | 0.17631  |
| =  | =         | =      | =      | =      | =       | 137->141 | -0.2581  |
| =  | =         | =      | =      | =      | =       | 137->142 | 0.40368  |
| =  | =         | =      | =      | =      | =       | 138->147 | 0.34351  |
| 25 | Singlet-A | 0.0291 | 3.8224 | 324.36 | 30829.9 |          |          |
| =  | =         | =      | =      | =      | =       | 126->139 | -0.32113 |
| =  | =         | =      | =      | =      | =       | 127->139 | -0.12393 |
| =  | =         | =      | =      | =      | =       | 132->140 | -0.13012 |
| =  | =         | =      | =      | =      | =       | 134->140 | 0.17032  |
| =  | =         | =      | =      | =      | =       | 137->141 | 0.23125  |
| =  | =         | =      | =      | =      | =       | 137->142 | -0.27159 |
| =  | =         | =      | =      | =      | =       | 137->143 | -0.12409 |
| =  | =         | =      | =      | =      | =       | 137->144 | -0.14724 |
| =  | =         | =      | =      | =      | =       | 138->147 | 0.34072  |
| 26 | Singlet-A | 0.0026 | 3.8463 | 322.35 | 31022.2 |          |          |
| =  | =         | =      | =      | =      | =       | 126->139 | -0.13805 |

|    |           |        |        |        |         |          |          |
|----|-----------|--------|--------|--------|---------|----------|----------|
| =  | =         | =      | =      | =      | =       | 127->139 | 0.1221   |
| =  | =         | =      | =      | =      | =       | 130->140 | -0.10242 |
| =  | =         | =      | =      | =      | =       | 132->140 | -0.10735 |
| =  | =         | =      | =      | =      | =       | 133->140 | -0.15231 |
| =  | =         | =      | =      | =      | =       | 137->141 | 0.24901  |
| =  | =         | =      | =      | =      | =       | 137->142 | 0.46567  |
| =  | =         | =      | =      | =      | =       | 137->144 | -0.16554 |
| =  | =         | =      | =      | =      | =       | 137->145 | -0.2585  |
| 27 | Singlet-A | 0.0016 | 3.8515 | 321.91 | 31064.6 |          |          |
| =  | =         | =      | =      | =      | =       | 126->139 | -0.16726 |
| =  | =         | =      | =      | =      | =       | 132->140 | 0.31442  |
| =  | =         | =      | =      | =      | =       | 133->140 | 0.41582  |
| =  | =         | =      | =      | =      | =       | 137->143 | -0.14703 |
| =  | =         | =      | =      | =      | =       | 137->144 | -0.34565 |
| =  | =         | =      | =      | =      | =       | 138->147 | -0.14807 |
| 28 | Singlet-A | 0.0085 | 3.8542 | 321.69 | 31085.8 |          |          |
| =  | =         | =      | =      | =      | =       | 126->139 | -0.32078 |
| =  | =         | =      | =      | =      | =       | 133->140 | 0.12064  |
| =  | =         | =      | =      | =      | =       | 137->143 | 0.57447  |
| =  | =         | =      | =      | =      | =       | 137->144 | 0.13996  |
| 29 | Singlet-A | 0.0104 | 3.8589 | 321.29 | 31124.5 |          |          |
| =  | =         | =      | =      | =      | =       | 126->139 | 0.37052  |
| =  | =         | =      | =      | =      | =       | 127->139 | -0.10054 |
| =  | =         | =      | =      | =      | =       | 137->143 | 0.32034  |
| =  | =         | =      | =      | =      | =       | 137->144 | -0.36545 |
| =  | =         | =      | =      | =      | =       | 137->145 | -0.19933 |
| =  | =         | =      | =      | =      | =       | 138->147 | 0.19977  |
| 30 | Singlet-A | 0.0378 | 3.8749 | 319.97 | 31252.9 |          |          |
| =  | =         | =      | =      | =      | =       | 132->140 | -0.20296 |
| =  | =         | =      | =      | =      | =       | 133->140 | -0.14445 |
| =  | =         | =      | =      | =      | =       | 137->143 | 0.10018  |
| =  | =         | =      | =      | =      | =       | 137->144 | -0.35262 |
| =  | =         | =      | =      | =      | =       | 137->145 | 0.50456  |
| =  | =         | =      | =      | =      | =       | 137->146 | -0.15034 |
